# Supplementary material for: BDCA1+ cDC2s, BDCA2+ pDCs and BDCA3+ cDC1s reveal distinct pathophysiologic features and impact on clinical outcomes in melanoma patients
Source: PubMed Central journal article supplement (PMC7684973; doi:10.1002/cti2.1190), 2020-11-24
Supplement: CTI2-9-e1190-s001.pdf [file CTI2-9-e1190-s001.pdf]

## Supplementary Figure legends

### **Supplementary Figure 1. Multi-parametric flow cytometry approach to simultaneously depict BDCA1+ DC/cDC2s, BDCA2+ DC/pDCs and BDCA3+ DC/cDC1s**

**(a)** DC subsets' gating strategy. This technique allows the study of the three major human DC subsets in the same sample by using specific surface markers. FSC-A and SSC-A parameters allowed to first exclude cell debris. Single cells were then gated and dead cells excluded with Live and Dead cell staining. Within CD45<sup>+</sup> cells, Lin-HLA-DR<sup>+</sup> cells were then selected and further distinguished using CD11c and BDCA2+BDCA3 markers. Within CD45<sup>+</sup>Lin-HLA-DR<sup>+</sup>CD11c<sup>+</sup> BDCA2-BDCA3<sup>-</sup> cells, cDC2s were finally depicted using BDCA1 positive labeling. Thus, BDCA1<sup>+</sup> cDC2s were defined as CD45<sup>+</sup> Lin<sup>-</sup> HLA-DR<sup>+</sup> CD11c<sup>+</sup> BDCA1<sup>+</sup>, BDCA2<sup>+</sup> pDCs were depicted as CD45<sup>+</sup> Lin<sup>-</sup> HLA-DR<sup>+</sup> CD11c<sup>-</sup> BDCA2<sup>+</sup>, and BDCA3<sup>+</sup> cDC1s highlighted as CD45<sup>+</sup> Lin<sup>-</sup> HLA-DR<sup>+</sup> CD11c<sup>+</sup> BDCA3<sup>+</sup>. Representative flow cytometry plots from a HD. **(b)** Representative dot plots depicting the three major DC subsets in blood (healthy donors, patients) and tissues (non-tumor and metastatic melanoma).

### **Supplementary Figure 2. Impact of disease stage and tumor location, and inter-relations between DC subsets in blood and tumor of melanoma patients compared to controls**

PBMC and tumor-infiltrating cells from melanoma patients together with PBMC from HD and control tissues were labelled with specific antibodies allowing depicting the three DC subsets and submitted to flow cytometry analysis. **(a)** Frequencies of the three circulating DC subsets were compared between early stage I-II (grey symbols, n=10) and late stage III-IV (black symbols, n=7) patients. **(b)** Among tumor-infiltrating cells, samples were separated according to the location of the tumor. Frequencies of the three DC subsets in lymph node (grey symbols, n=12) and cutaneous (black symbols, n=7) metastases of melanoma patients. Results are expressed as percentages of positive cells. Bars indicate mean. *P*-values were calculated using Mann-Whitney test. **(c)** Comparative frequencies of BDCA1<sup>+</sup> cDC2s (triangles), BDCA2<sup>+</sup> pDCs (circles) and BDCA3<sup>+</sup> cDC1s (diamonds) within alive CD45<sup>+</sup> cells in the blood of healthy donors (HD, n=22) and patients (Pt, n=17), non-tumor tissue (tonsils, n=9) and tumor infiltrate of melanoma patients (n=23). Bars indicate mean. *P*-values were calculated using

Wilcoxon (dashed lines) and Friedman with post hoc Dunns' multiple comparison test (straight lines) non parametric tests.  $*P \leq 0.05$ ,  $** P \leq 0.01$ ,  $***P \leq 0.001$ . **(d)** Pie charts representing the relative proportions of each DC subsets in each group (BDCA1+ cDC2s, blue; BDCA2+ pDCs, red; BDCA3+ cDC1s, green). **(e)** Relative proportions of each DC subsets compared to all DCs in patients' blood (n=17), lymph nodes (n=12) and cutaneous (n=7) metastases. Bars indicate mean. *P*-values were calculated using Mann-Whitney test. **(f)** Comparative PFS (from diagnosis time) of patients with low or high circulating pDC frequencies. Groups were separated using the median percentage of circulating pDCs within CD45+ cells (0.196%) (n=8 or 9 patients/group). Comparison using Log-rank test.

**Supplementary Figure 3. Circulating and tumor-infiltrating DCs in patients can be differentiated from healthy donors by their frequencies and basal activation status**

The expression of the co-activation molecules CD80, CD40, and CD86 on the three DC subsets was analyzed by flow cytometry on PBMCs and tumor infiltrating cells of melanoma patients, HD or non-tumor tissue controls, and correlated with the clinical parameters of the corresponding patients. **(a)** Representative flow cytometry dot plots of CD40 expression by BDCA1+ cDC2s (blue), BDCA2+ pDCs (pink), and BDCA3+ cDC1s (green) of healthy donor or patient blood and tumor infiltrate of melanoma patient. **(b)** Comparative expression levels (MFI) of the co-stimulatory molecules CD80, CD40 and CD86 were analyzed on the three CD80-, CD40- or CD86-expressing DC subsets by flow cytometry on healthy donor (HD, n=19 to 22) and patient (Pt, n=9 to 17) blood, tumor infiltrate of melanoma patients (n=23 or 24) and non-tumor tissue (tonsils, n=8 or 9). Only samples where the proportions of CD80-, CD40- or CD86-expressing cells were above 2% were kept for this analysis. Bars indicate mean. *P*-values were calculated using Mann-Whitney (dashed lines) and Kruskal-Wallis with post hoc Dunns' multiple comparison test (straight lines) non parametric tests.  $*P \leq 0.05$ ,  $**P \leq 0.01$ ,  $***P \leq 0.001$ . **(c, d)** Comparative expression levels of the co-stimulatory molecule CD86 on the three DC subsets **(c)** from the blood of early stage I-II (grey symbols, n=10) and late stage III-IV (black symbols, n=7) patients and **(d)** in lymph nodes (n=10) and cutaneous (n=7) metastases. Results are expressed as percentages of positive cells within the corresponding DC subset. Bars indicate mean.

*P*-values were calculated using Mann-Whitney test. **(e)** Comparative PFS (from sampling time – left panel) and OS (from diagnosis time – right panel) of patients with low or high tumor-infiltrating CD80+ or CD40+ pDCs respectively. Groups were separated using the median percentage of tumor-infiltrating CD80+ (4.04%) and CD40+ (71.67%) pDCs (n=7 to 11 patients/groups). **(f)** Comparative OS (from sampling time) of patients with low or high circulating CD40+ cDC1s. Groups were separated using the median percentage of circulating CD40+ cDC1s (90.10%) (n=8 or 9 patients/group). **(e-f)** Comparison using Log-rank test. **(g)** Graph of variables relative to the PCA shown on Figure 3B (left panel : all DC subsets, right panel: cDC2s). **(h)** PCA based on DC subsets co-stimulatory molecules expression (CD80, CD40, CD86) for BDCA2+ pDCs and BDCA3+ cDC1s (including their graph of variables). **(i)** Spearman correlations table showing *r* factors with their significant *P*-values (<0.05) after Bonferroni–Holm’s correction in each sample group (HD blood, patient blood, tumor infiltrate).

**Supplementary Figure 4. The maturation status of circulating and tumor-infiltrating BDCA1+ cDC2s and BDCA2+ pDCs from melanoma patients upon TLR stimulation dictated their overall survival**

Cell suspensions from blood (HD, n=17; Pt, n=15) or tumor infiltrates (Pt, n=12) were stimulated or not for 21h with or without TLR ligands (polyI:C, R848 or CpG<sub>A</sub>) alone or mixed together (mix). The expression levels of the co-stimulatory molecules CD80, CD40 and CD86 were measured on BDCA1+ cDC2s and BDCA2+ pDCs using flow cytometry and correlated with the clinical parameters of the corresponding patients. **(a)** Comparative expression levels (MFI) of the co-stimulatory molecules CD80, CD40 and CD86 were analyzed on CD80-, CD40- or CD86-expressing DC subsets by flow cytometry. Bars indicate mean. Stars indicate significant differences compared to the control condition without stimulation (-) within each group. *P*-values were calculated using Mann-Whitney (dashed lines) and Kruskal-Wallis with post hoc Dunns’ multiple comparison test (stars) non parametric tests. \**P* ≤ 0.05, \*\*\**P* ≤ 0.001. **(b)** Comparative PFS (from sampling (left) or diagnosis (right) time) of patients with low or high tumor-infiltrating CD40+ cDC2s and CD80+ pDCs in absence of TLR stimulation. Groups were separated using the median percentage of CD40+ cDC2s

(93.27%) and CD80+ pDCs (16.48%) from unstimulated tumor infiltrates (n=4-6 patients/group). **(c-d)** Comparative expression levels of the co-stimulatory molecule CD86 on cDC2s and pDCs **(c)** from the blood of early stage I-II (grey symbols, n=8 or 9) and late stage III-IV (black symbols, n=4 to 6) patients, and **(d)** in lymph nodes (n=6) and cutaneous (n=3) metastases. Results are expressed as percentages of positive cells within the corresponding DC subset. Bars indicate mean. *P*-values were calculated using Mann-Whitney (dashed lines) and Kruskal-Wallis with post hoc Dunns' multiple comparison test (full lines) non parametric tests. **(e)** Comparative PFS (from diagnosis time) of patients with low or high CD80+ or CD40+ cDC2s after R848 stimulation and CD86+ pDCs after CpG<sub>A</sub> stimulation of circulating cells. Groups were separated using the median percentage of circulating CD80+ (19.83%) and CD40+ (48.34%) cDC2s after R848 stimulation, and CD86+ pDCs (40.15%) after CpG<sub>A</sub> stimulation (n=5 or 6 patients/groups). **(f)** Comparative OS (from sampling time) of patients with low or high CD86+ cDC2s after mix TLR-L mix stimulation of tumor-infiltrating cells. Groups were separated using the median percentage of CD86+ cDC2s after mix TLRL stimulation (70.86%) (n=5 or 6 patients/group). **(e-f)** Comparison using Log-rank test.

**Supplementary Figure 5. Expression of co-stimulatory molecules by circulating and tumor-infiltrating cDC2s and pDCs upon TLR triggering segregated them from healthy donors and impacted the clinical outcome of melanoma patients**

Cell suspensions from blood (HD, n=17; Pt, n=15) or tumor infiltrates (n=14) were stimulated or not for 21h with or without TLR-L (polyI:C, R848 or CpGA) alone or mixed together (mix). The expression of the co-stimulatory molecules CD80, CD40 and CD86 were measured on cDC2s and pDCs using flow cytometry and correlated with the clinical parameters of the corresponding patients. **(a)** Comparative OS (from diagnosis time) of patients with low or high CD80+ or CD40+ cDC2s and CD86+ pDCs after stimulation of PBMC with R848 or CpGA respectively. Groups were separated using the median percentage of CD80+ cDC2s (19.84%), CD40+ cDC2s (48.34%) and CD86+ pDCs (40.15%) after stimulation with R848 and CpGA respectively (n=5 or 6 patients/group). **(b)** Comparative PFS and OS (from sampling time) of patients with low or high CD86+ cDC2s upon stimulation of tumor-infiltrating cells with R848 or mix TLR-L. Groups were separated using the

median percentage of CD86+ cDC2s following stimulation with a mixture of TLR-L (70.86%) or R848 (66.07%) (n=4-5 patients/group). **(c)** Comparative OS (from diagnosis (left) or sampling (right) time) of patients with low or high proportions of pDCs positive for CD80 or CD86 following stimulation of tumor-infiltrating cells with CpGA or mix TLR-L. Groups were separated using the median percentage of CD80+ pDCs (49.23%) or CD86+ pDCs (54.69%) (n=4 to 6 patients/group) upon stimulation with mix TLR-L or CpGA. **(a-c)** Comparison using Log-rank test.

**Supplementary Figure 6. The inter-relations between co-stimulatory molecules-expressing DC subsets after TLR-triggering were altered in the context of melanoma, and impacted on patients' clinical outcome**

Cell suspensions from blood (HD, n=17; Pt, n=15) or tumor infiltrates (Pt, n=12) were stimulated or not for 21h with or without TLR ligands (polyI:C, R848 or CpG<sub>A</sub>) alone or mixed together (mix). The expression levels of the co-stimulatory molecules CD80, CD40 and CD86 were measured on BDCA1+ cDC2s and BDCA2+ pDCs using flow cytometry and correlated between them. cDC1s were removed from the analysis due to cell scarcity after 20h culture. **(a)** Heat map based on co-stimulatory molecule expressions by cDC2s and pDCs with or without a 20h stimulation with TLR-L (polyI:C, R848 or CpG<sub>A</sub>) in each sample type (HD blood, patient blood and tumor infiltrate). **(b)** PCA and graph of variables (in HD blood, patient blood and tumor infiltrate) of co-stimulatory molecule expression (CD80, CD40 and CD86) by cDC2s and pDCs after TLR stimulation (polyI:C, R848 or CpGA). **(c)** PCA based on co-stimulatory molecules expression (CD80, CD40 and CD86) by cDC2s and pDCs after a 20h stimulation with TLRL in each sample group (HD blood, patient blood, tumor infiltrate) together with their corresponding graph of variables. **(d)** Correlation matrix between co-stimulatory molecule-expressing cDC2s and pDCs after a 20h TLRL stimulation (polyI:C, R848 or CpG<sub>A</sub> alone or mixed together) in HD blood (left panel), patient blood (right panel) and tumor infiltrate (bottom panel). Spearman correlations with significant *P*-values (< 0.05) after Bonferroni–Holm's correction are circled in black. “Stim.” corresponds to condition without ex-vivo TLR triggering, and “X” stands for percentage. **(e)** Table summarizing the intra-DCs and inter-DCs spearman correlations showing *r* factors with their significant *P*-values (< 0.05) after Bonferroni–

Holm's correction in each sample group (HD blood, patient blood, tumor infiltrate). Only parameters for which significant correlations were observed in at least one of the groups are shown.

**Supplementary Figure 7. Intracellular IL-12p40/p70, IFN $\alpha$  and IFN $\lambda$ 1 cytokine analysis within circulating and tumor-infiltrating DC subsets following stimulation with TLR**

Cell suspensions from blood (HD, n=15, open circles; Pt, n=17, filled circles) or tumor infiltrates (Pt, n=16, filled triangles) were stimulated for 5h with or without TLR-L (polyI:C, R848 or CpG<sub>A</sub>) alone or mixed together, and the production of cytokines was evaluated by intracellular cytokine staining using flow cytometry. **(a)** Representative flow cytometry dot plots of healthy donor or patient blood and tumor infiltrate of melanoma patient displaying intracellular staining for IL12p40/70, IFN $\alpha$  and IFN $\lambda$ 1 within respectively BDCA1+ cDC2s (blue, top panels), BDCA2+ pDCs (pink, middle panels), and BDCA3+ cDC1s (green, lower panels) following stimulation or not with R848 or polyI:C as indicated. **(b)** Comparative proportion of cytokine-expressing cDC2s, pDCs and cDC1s from the blood of early stage I-II (white symbols, n=10) and late stage III-IV (black symbols, n=7) patients. Results are expressed as percentages of positive cells within the corresponding DC subset. Bars indicate mean. *P*-values were calculated using Mann-Whitney (dashed lines) and Kruskal-Wallis with post hoc Dunns' multiple comparison test (full lines) non parametric tests.

**Supplementary Figure 8. The inter-relations between cytokine-expressing DC subsets after TLR triggering s were altered in the context of melanoma, and impacted on patients' clinical outcome**

Cell suspensions from blood (HD, n=15, open circles; Pt, n=17, filled circles) or tumor infiltrates (Pt, n=16, filled triangles) were stimulated for 5h with or without TLR-L (polyI:C, R848 or CpG<sub>A</sub>) alone or mixed together. The production of cytokines was evaluated by intracellular cytokine staining using flow cytometry and correlated with the clinical parameters of the corresponding patients and also between them. **(a)** Comparative PFS (from sampling time) of patients with low or high TNF $\alpha$ + cDC2s and IFN $\alpha$ + pDCs after stimulation of tumor-infiltrating cells with R848. Groups were separated using the median percentage of TNF $\alpha$ + cDC2s (15.07%) and IFN $\alpha$ + pDCs (6.72%) after R848 stimulation

(n=2 to 4 patients/group). Comparison using Log-rank test. **(b)** Comparative proportion of cytokine-expressing cDC2s, pDCs and cDC1s in lymph nodes (n=7) and cutaneous (n=3) metastases. Results are expressed as percentages of positive cells within the corresponding DC subset. Bars indicate mean. *P*-values were calculated using Mann-Whitney (dashed lines) and Kruskal-Wallis with post hoc Dunns' multiple comparison test (full lines) non parametric tests. **(c)** Graph of variables relative to the PCA displayed on Figure 7D. **(d)** PCA based on intra-cellular cytokine expressions (IL-12p40/p70, IFN $\alpha$ , IFN $\lambda$ 1, TNF $\alpha$ ) by cDC2s, pDCs and cDC1s upon 5h stimulation with or without TLRL in each sample group (HD blood, patient blood, tumor infiltrate). **(e)** Correlation matrix between cytokine-expressing DC subsets after 20h TLR stimulation (polyI:C, R848 or CpG $_A$  alone or mixed together) in HD blood (left panel), patient blood (right panel) and tumor infiltrate (bottom panel). Spearman correlations with significant *P*-values (<0.05) after Bonferroni–Holm's correction are circled in black. **(f)** Table summarizing the intra-DCs and inter-DCs spearman correlations showing *r* factors with their significant *P*-values (<0.05) after Bonferroni–Holm's correction in each sample group (HD blood, patient blood, tumor infiltrate). Only parameters for which significant correlations were observed in at least one of the groups are shown.

**Supplementary Figure 9. High levels of IL12p70, IFN $\alpha$  and IFN $\beta$  secreted from circulating and tumor-infiltrating cells after TLR stimulation are linked with better overall survival of melanoma patients**

Cell suspensions from blood (HD, n=18, open circles; Pt, n=15, filled circles) or tumor infiltrates (Pt, n=15, filled triangles) were stimulated for 20h with or without TLR-ligands (polyI:C, R848 or CpG $_A$ ) alone or mixed together. The culture supernatants were examined for the presence of IL-12p70, IFN $\alpha$ , IFN $\beta$ , IFN $\lambda$ 1 and IFN $\lambda$ 2 by Luminex technology, and correlated with the clinical parameters of the corresponding patients. **(a-b)** Comparative amounts of IL-12p70, IFN $\alpha$ , and IFN $\lambda$ 1 **(a)** from the blood of early stage I-II (white symbols, n=9) and late stage III-IV (black symbols, n=6) patients, and **(b)** in lymph nodes (n=7) and cutaneous (n=3) metastases. Bars indicate mean. *P*-values were calculated using Mann-Whitney (dashed lines) and Kruskal-Wallis with post hoc Dunns' multiple comparison test (full lines) non parametric tests. **(c)** Comparative OS (from diagnosis time) of patients

with low or high IL12p70, IFN $\alpha$  or IFN $\beta$  secretions from circulating immune cells in absence of stimulation or after stimulation with R848 or mix TLR-L as indicated. Groups were separated using the median of IFN $\alpha$  levels without stimulation (70.19pg/mL), the median of IL12p70 (39.05pg/mL) or IFN $\beta$  (307.63pg/mL) levels after mix TLR-L stimulation, or the median of IFN $\alpha$  levels after R848 stimulation (1303.02pg/mL) of circulating immune cells (n=6 or 9 patients/group). **(d)** Comparative OS (from diagnosis time) of patients with low or high IL12p70, IFN $\alpha$  or IFN $\beta$  secretions from tumor-infiltrating cells in absence of stimulation or after R848 stimulation as indicated. Groups were separated using the median of IFN $\alpha$  levels without stimulation (70.19pg/mL) (n=7 patients/group) or the median of IL12p70 (32.95pg/mL), IFN $\beta$  (193.76pg/mL) or IFN $\alpha$  (1218.37pg/mL) levels after R848 stimulation (n=3 or 4 patients/group). **(c-d)** Comparison using Log-rank test **(e)** Heat map of cytokine secretions (IL-12p70, IFN $\alpha$ , IFN $\beta$ , IFN $\lambda$ 1, IFN $\lambda$ 2) with or without stimulation with a mixture of TLR-L (polyI:C, R848 and CpG<sub>A</sub>) in each sample type (HD blood, patient blood and tumor infiltrate).

**Supplementary Figure 10. The inter-relations between cytokine secretions from circulating and tumor-infiltrating cells after TLR triggering were disturbed in melanoma patients**

Cell suspensions from blood (HD, n=16, open circles; Pt, n=15, filled circles) or tumor infiltrates (Pt, n=14, filled triangles) were stimulated for 20h with or without TLR-ligands (polyI:C, R848 or CpG<sub>A</sub>) alone or mixed together. The culture supernatants were examined for the presence of IL-12p70, IFN $\alpha$ , IFN $\beta$ , IFN $\lambda$ 1 and IFN $\lambda$ 2 by Luminex technology, and levels were correlated between them. **(a)** PCA based on secreted cytokine levels (IL-12p70, IFN $\alpha$ , IFN $\beta$ , IFN $\lambda$ 1, IFN $\lambda$ 2) upon 20h stimulation with or without TLRL in each sample group (HD blood, patient blood, tumor infiltrate). **(b)** Correlation matrix between secreted cytokines in response to a 20h stimulation with TLRL (polyI:C, R848 or CpG<sub>A</sub> alone or mixed together) in HD blood (left panel), patient blood (right panel) and tumor infiltrate (bottom panel). Spearman correlations with significant *P*-values (< 0.05) after Bonferroni–Holm’s correction are circled in black. **(c)** Table summarizing the spearman correlations showing *r* factors with their significant *P*-values (< 0.05) after Bonferroni–Holm’s correction in each sample



group (HD blood, patient blood, tumor infiltrate). Only parameters for which significant correlations were observed in at least one of the groups are shown.

**Supplementary Figure 11. The compass of immune deviations depicted in circulating and tumor-infiltrating DC subsets from melanoma patients**

The figure integrates the main phenotypic and functional modulations of circulating and tumor-infiltrating DC subsets (cDC2s, top panel; pDCs, middle panel; cDC1s bottom panel) that we highlighted in the paper. For each DC subset, we studied the proportions within CD45+ cells (green pie), the basal activation status (orange pie), the co-stimulatory molecule expression with (+) or without (-) TLR triggering (pink pie), and the intra-cellular cytokine expression after (+) or not (-) TLR triggering (purple pie). Black circle: HD condition; Blue arrow: Pt blood; Red arrow: Tumor infiltrate. The length of the arrows is proportional to the features observed in HD conditions. This figure has been created with BioRender science illustration tool.

**Supplementary Figure 12. Graphical summary of the findings**

# Suppl Figure 1

**a**

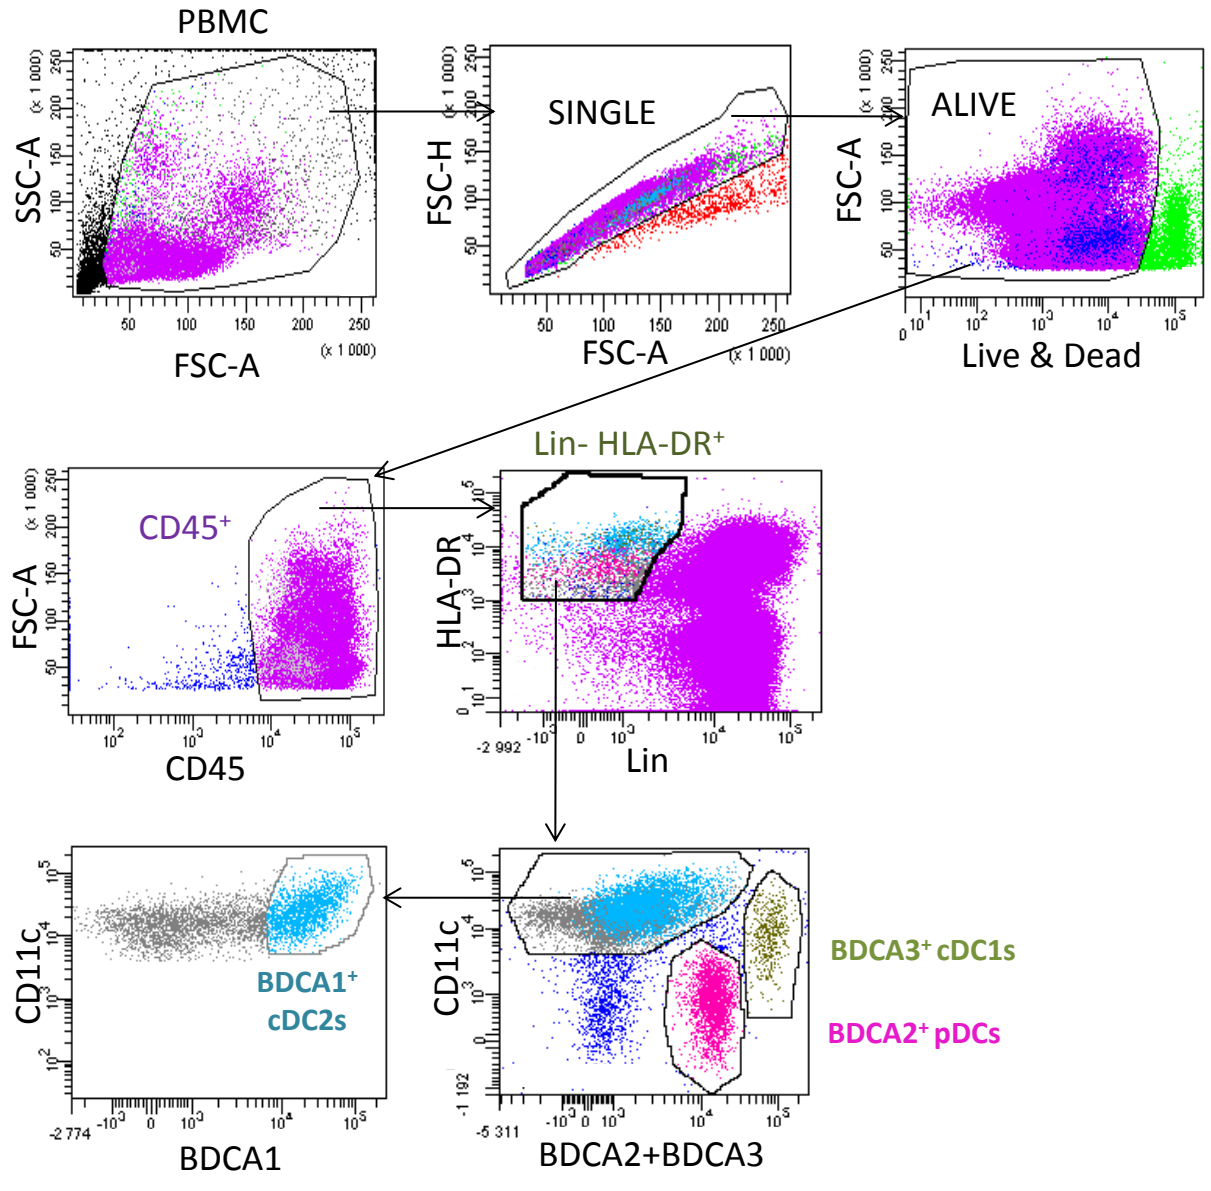

**b**

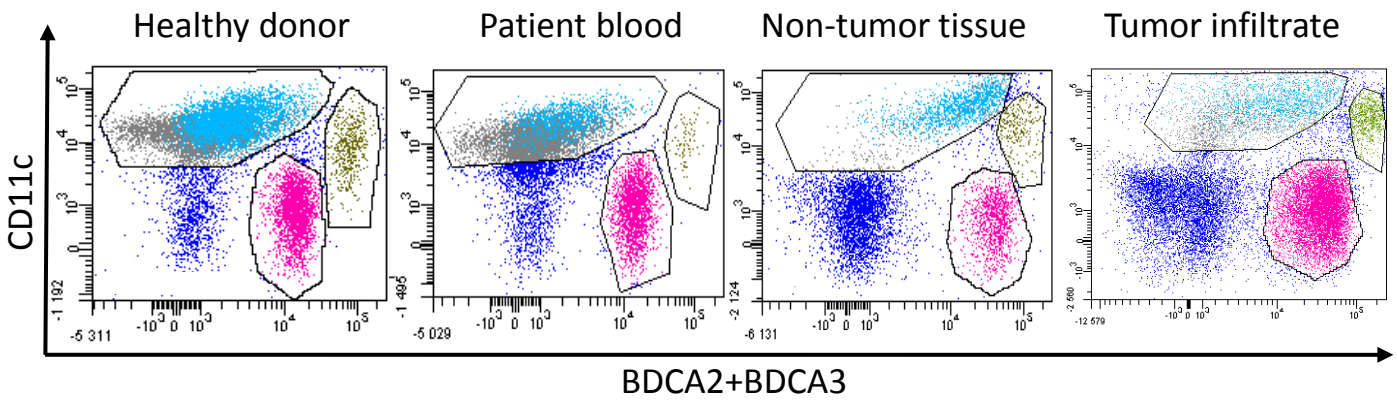

# Suppl Figure 2

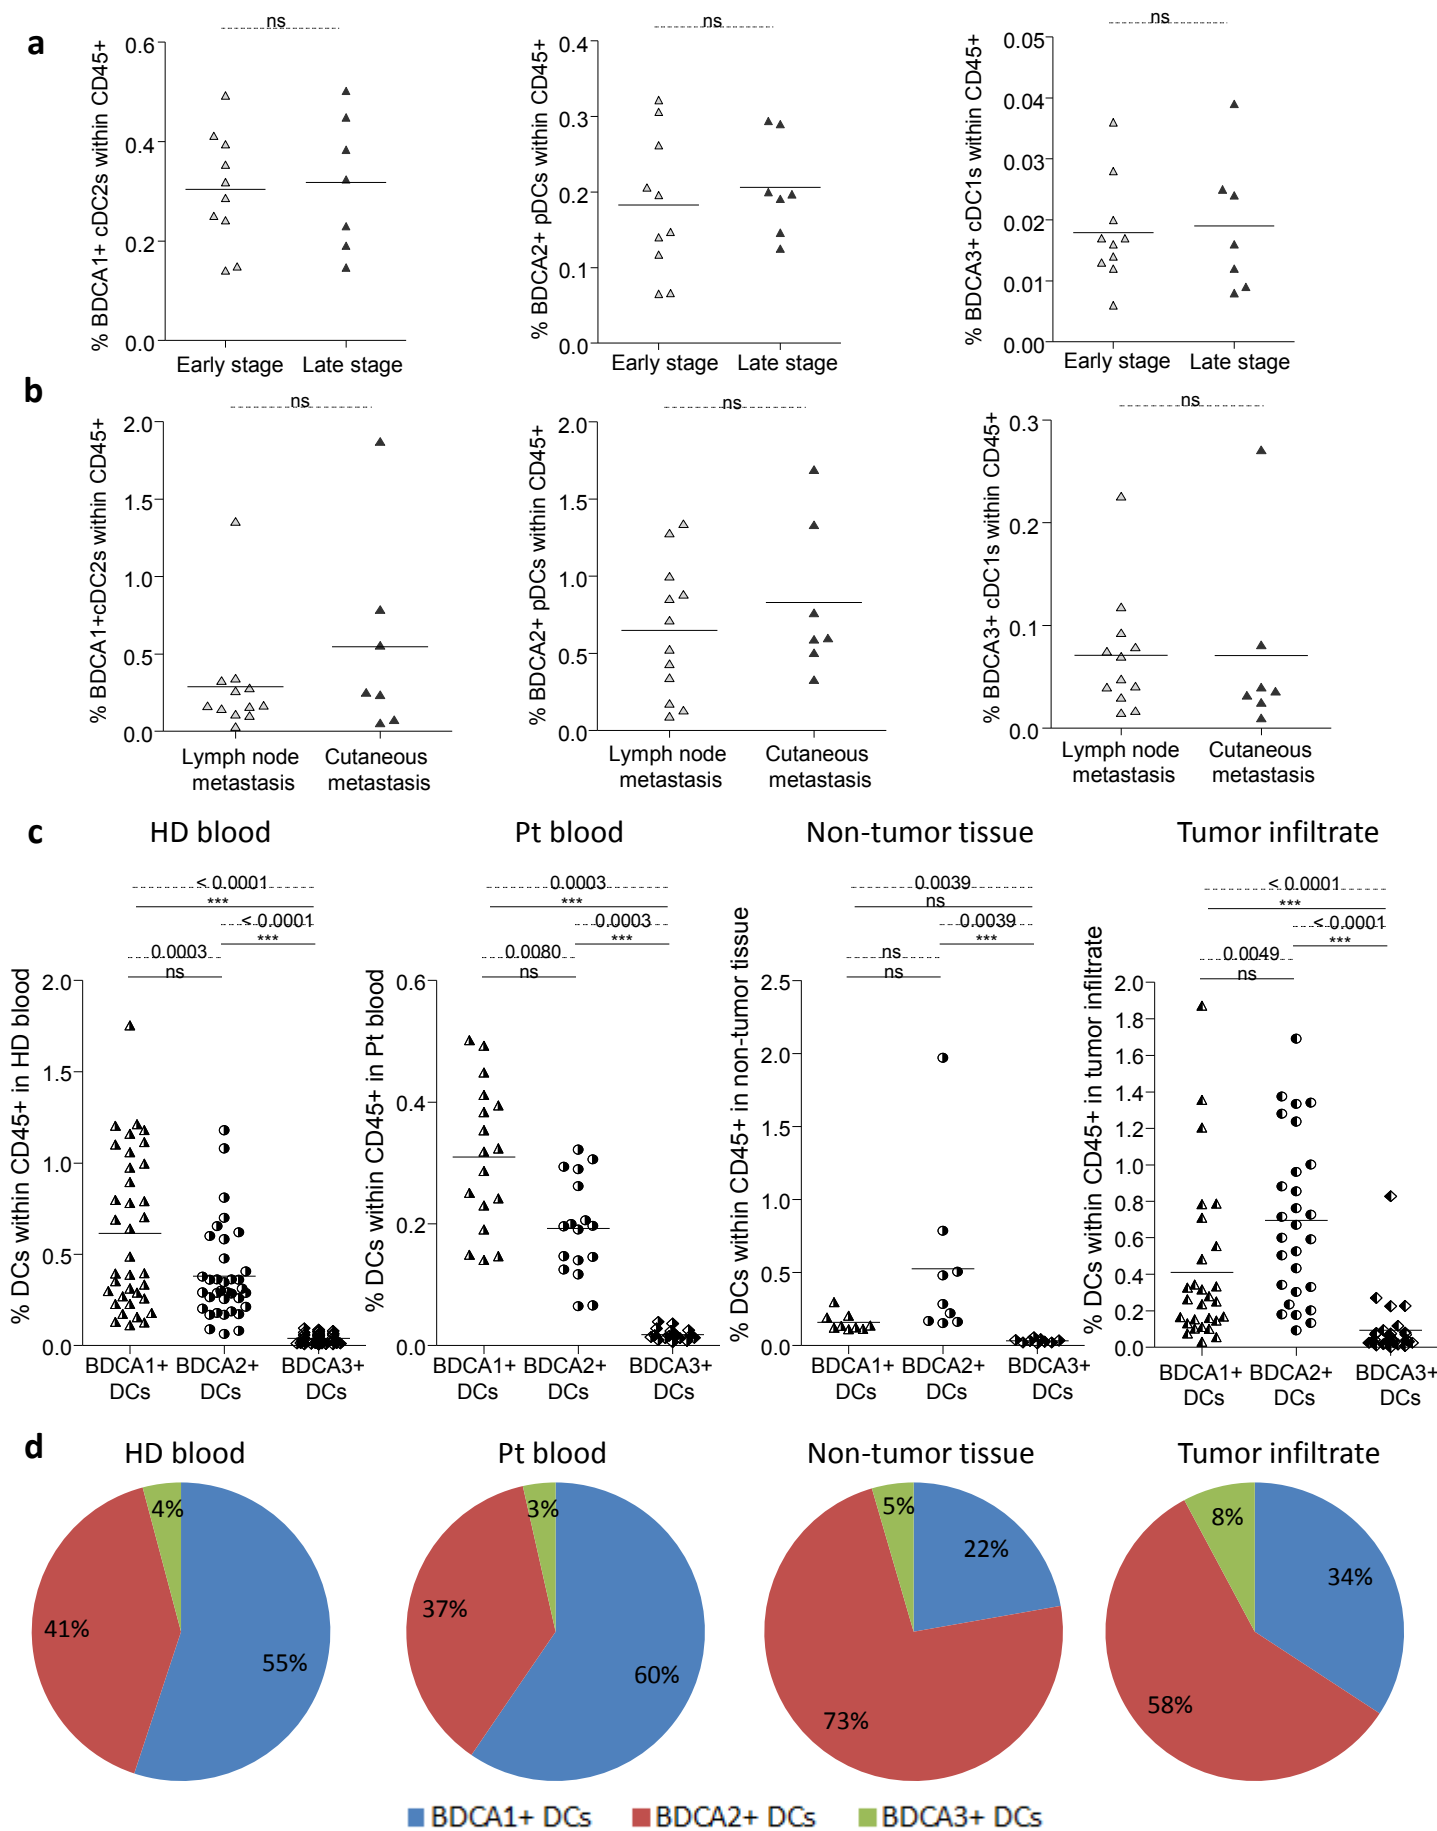

**e**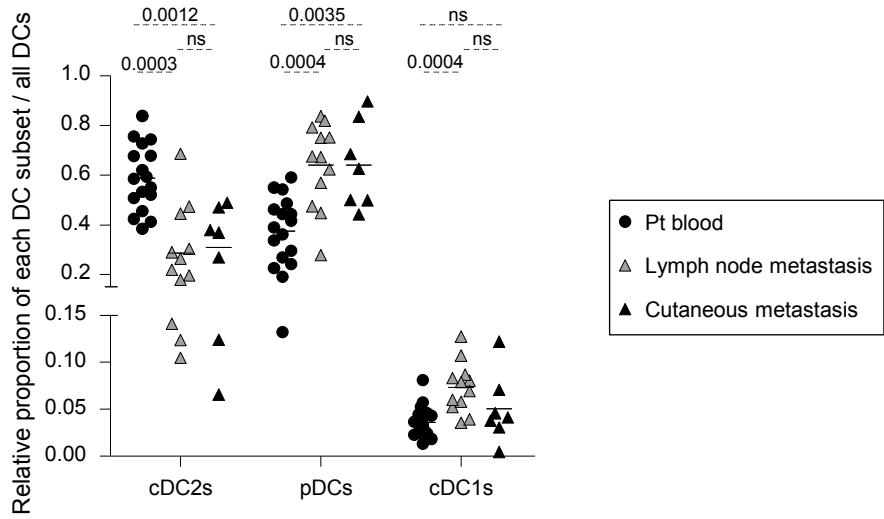**f**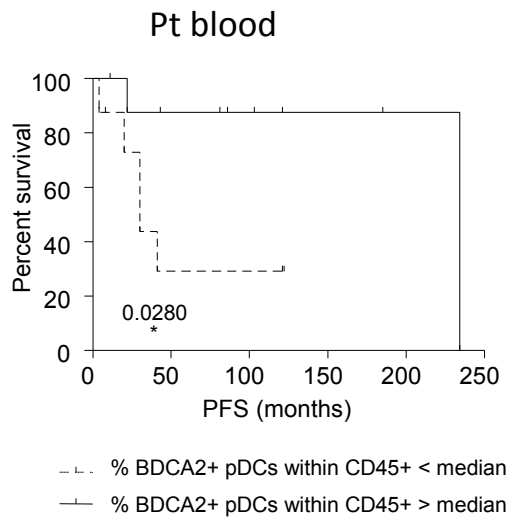

# Suppl Figure 3

a

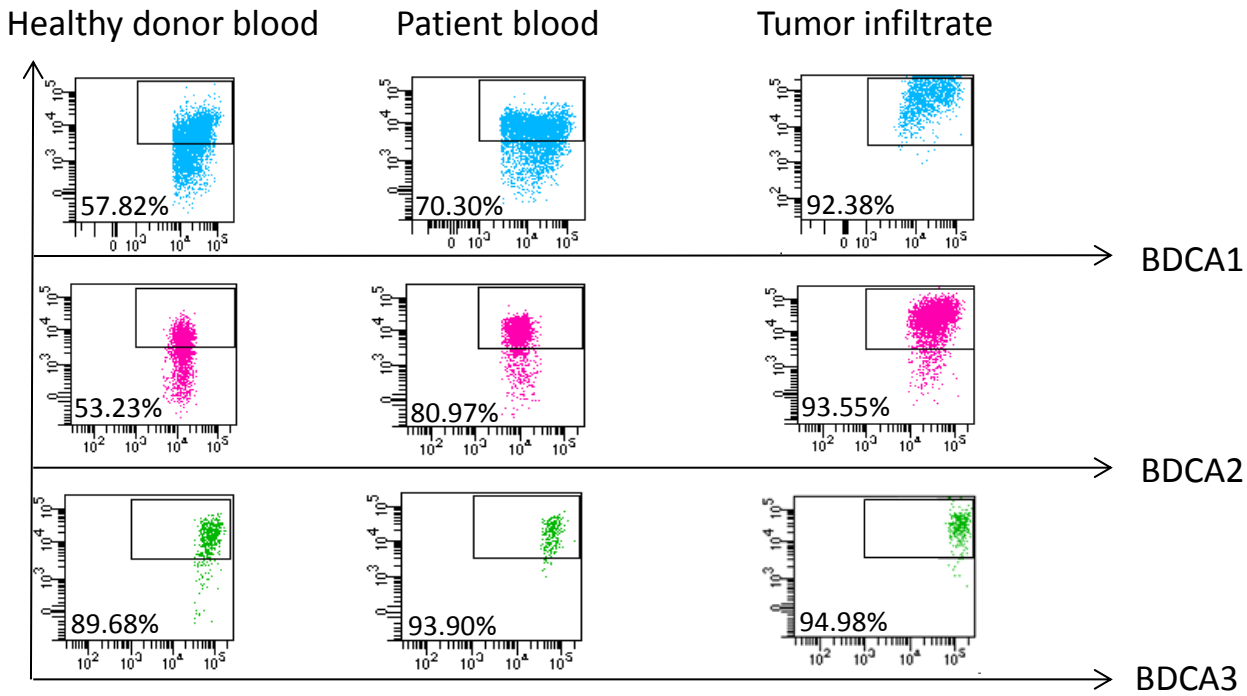

**b**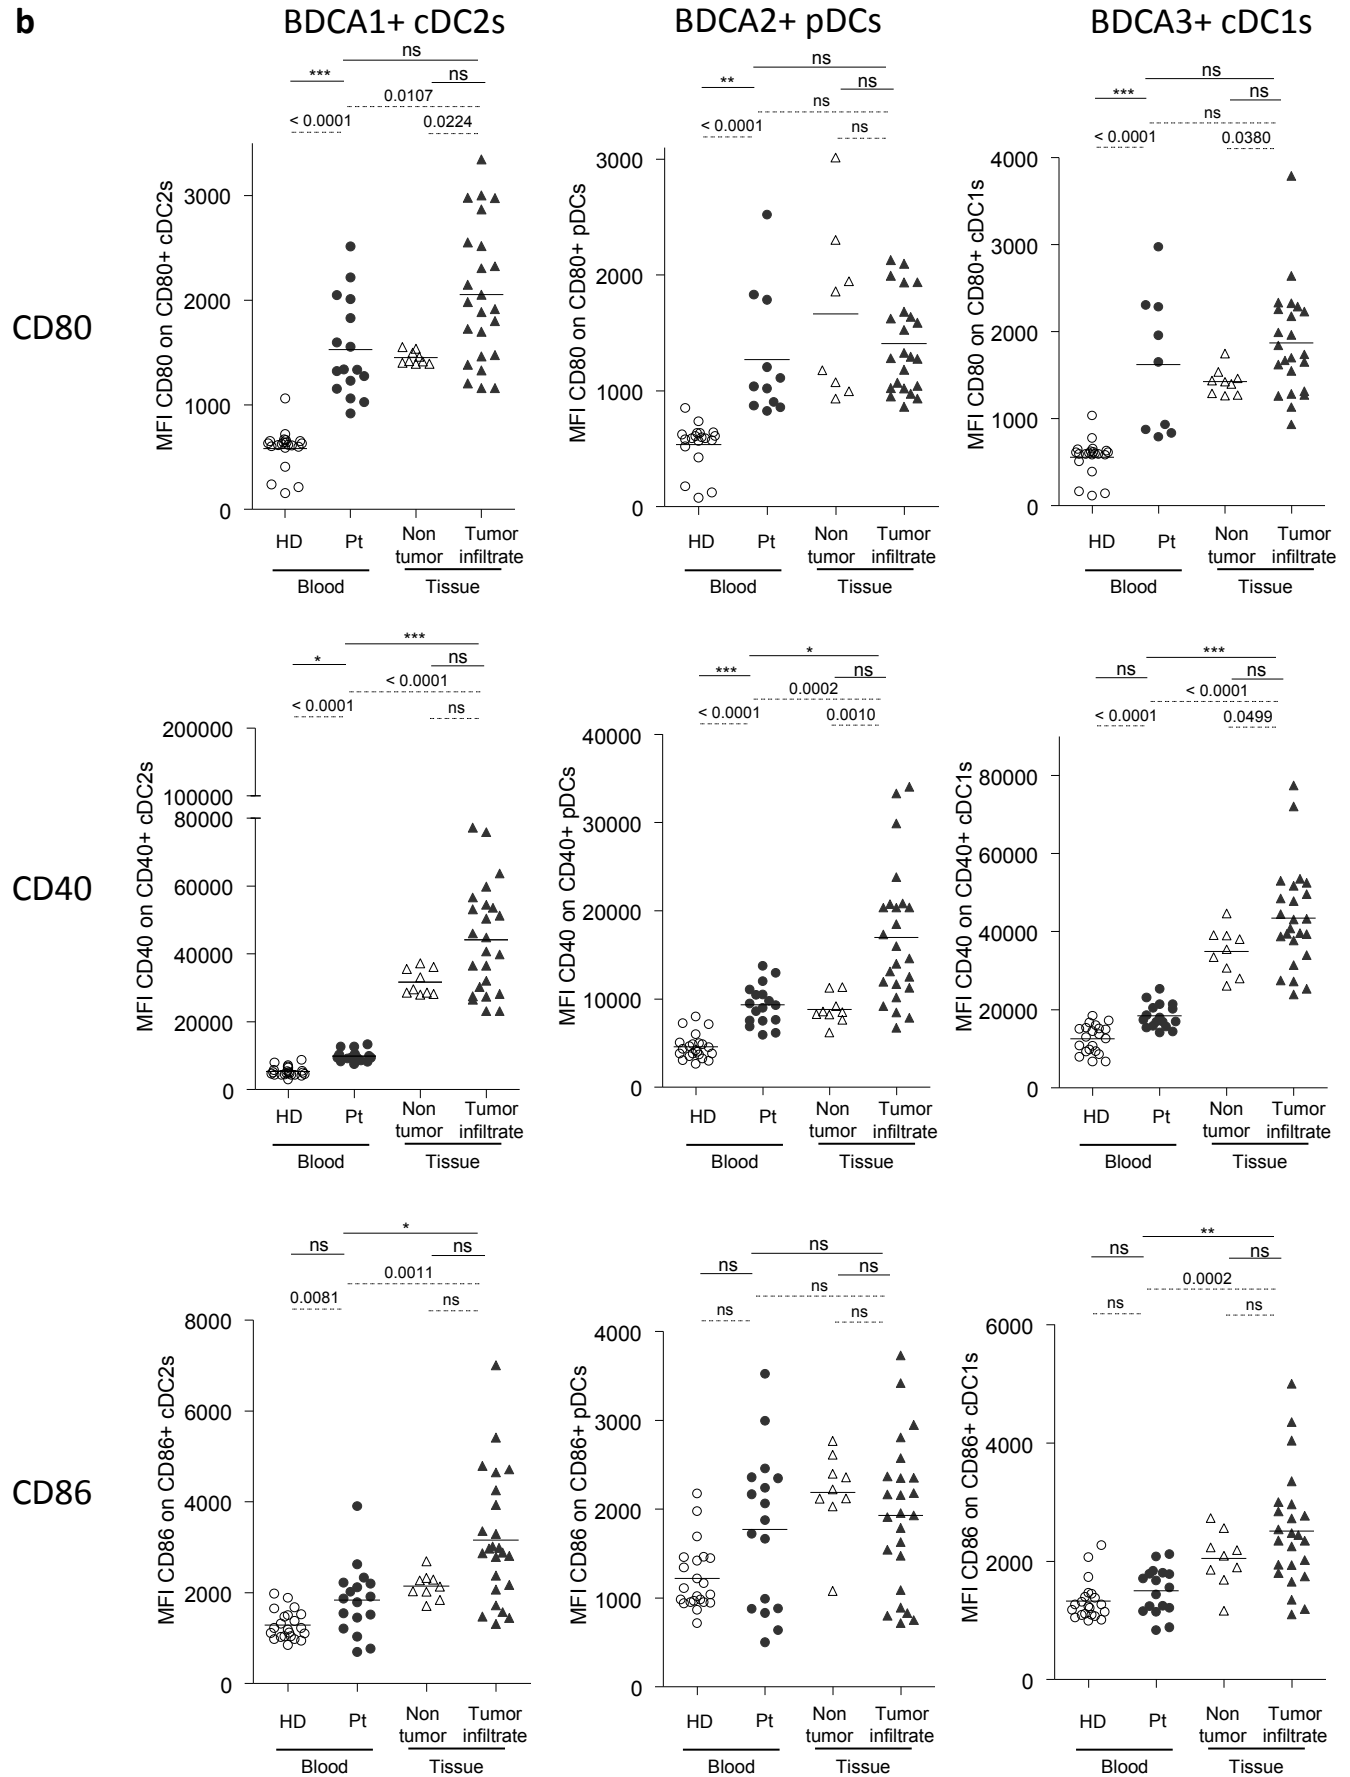

**c**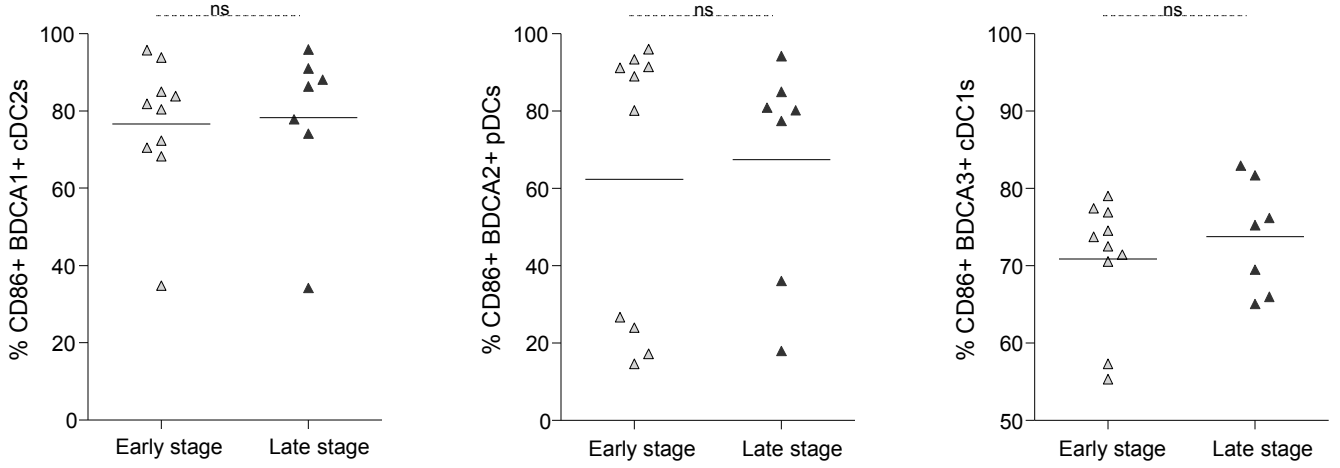**d**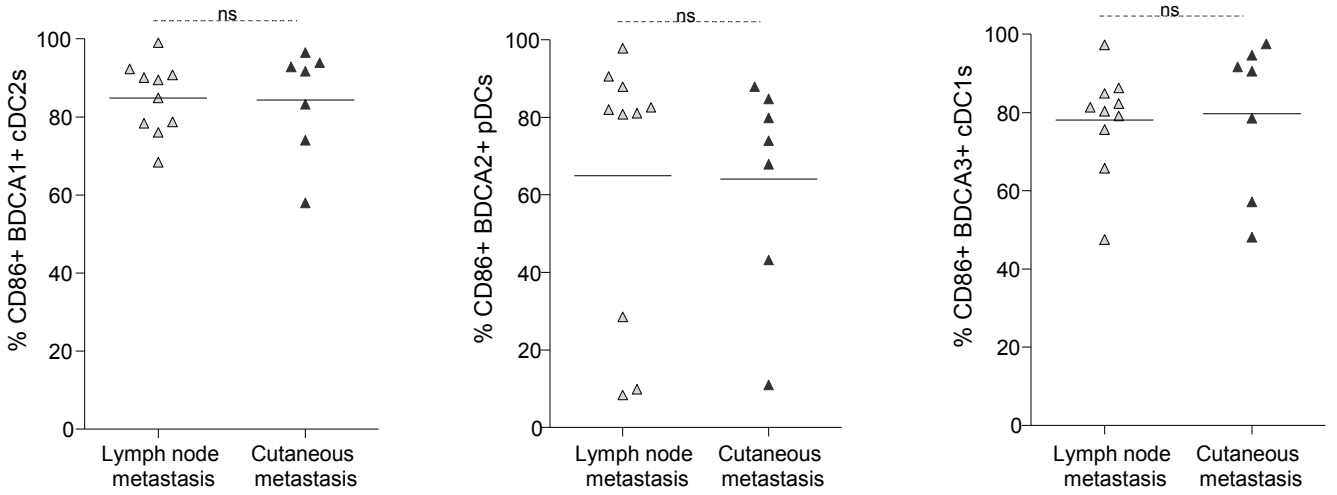**e****Tumor infiltrate**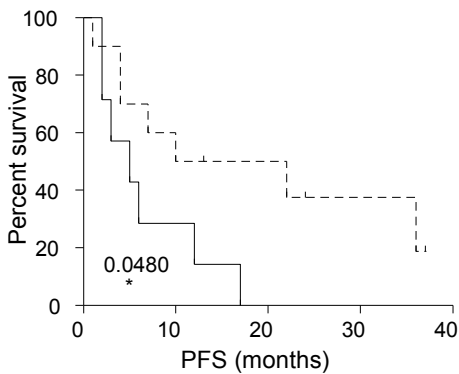

--- % CD80+ pDCs < median  
 — % CD80+ pDCs > median

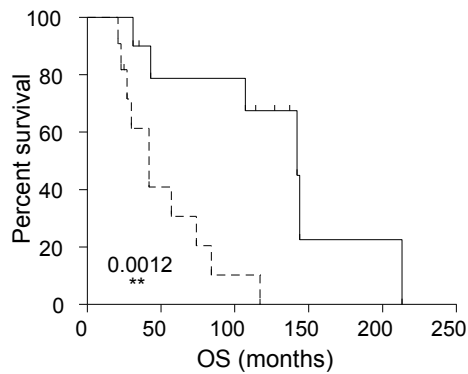

--- % CD40+ pDCs < median  
 — % CD40+ pDCs > median

**f****Pt blood**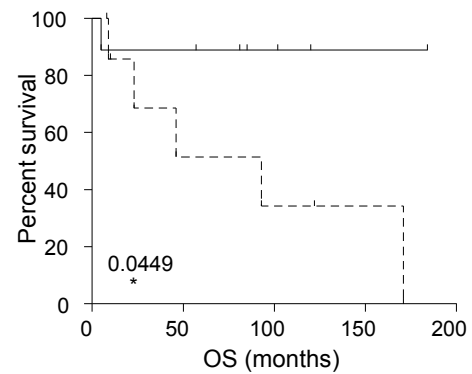

--- % CD40+ cDC1s < median  
 — % CD40+ cDC1s > median

g

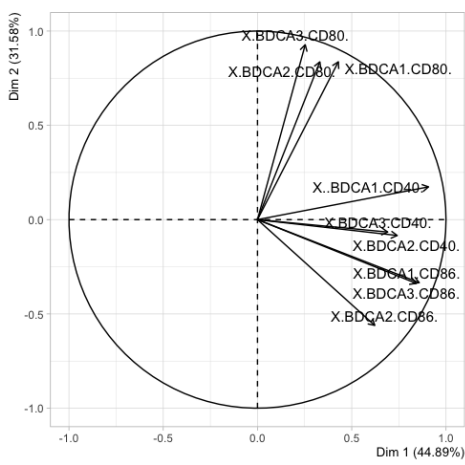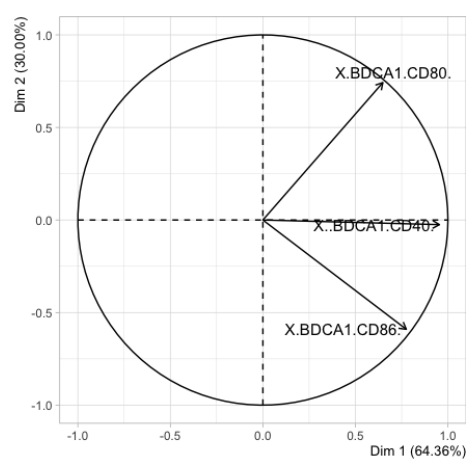

h

BDCA2+ pDCs

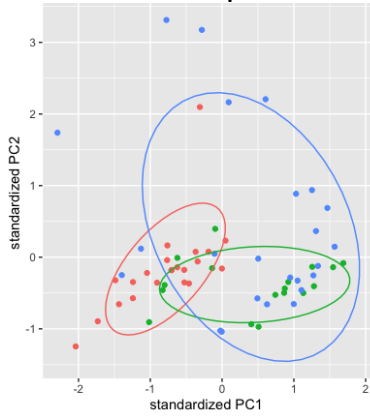

groups

- HD blood
- Pt blood
- Tumor infiltrate

BDCA3+ cDC1s

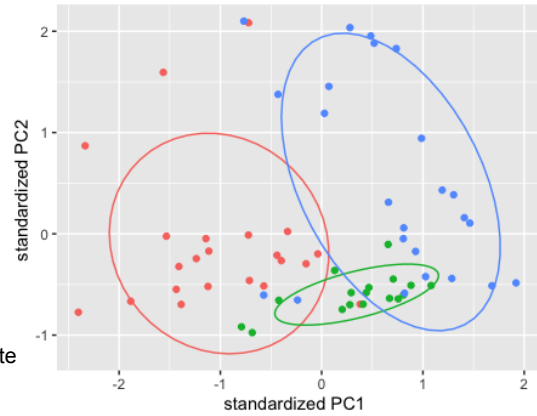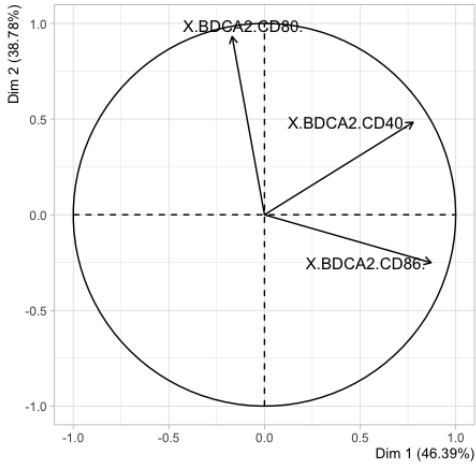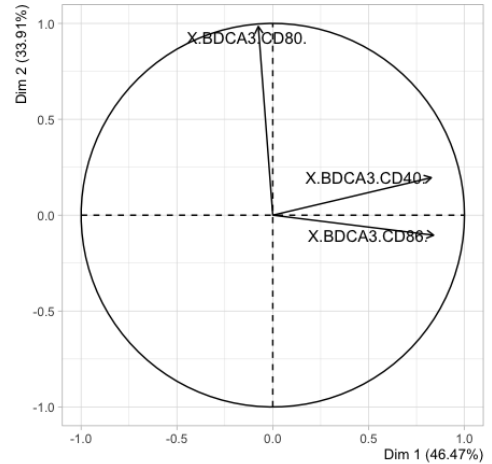

i

| Variables            |                      | HD blood |          | Pt blood |          | Pt TIL   |          |
|----------------------|----------------------|----------|----------|----------|----------|----------|----------|
|                      |                      | <i>r</i> | <i>p</i> | <i>r</i> | <i>p</i> | <i>r</i> | <i>p</i> |
| % BDCA1+ cDC2s CD40+ | % BDCA1+ cDC2s CD86+ | 0.74     | 0.004    | 0.12     | 1        | 0.07     | 1        |
| % BDCA1+ cDC2s CD80+ | % BDCA2+ pDCs CD80+  | 0.83     | 0.0001   | 0.63     | 0.220    | 0.77     | 0.0004   |
|                      | % BDCA2+ pDCs CD86+  | 0.33     | 1        | -0.19    | 1        | -0.64    | 0.021    |
|                      | % BDCA3+ cDC1s CD80+ | 0.93     | <0.0001  | 0.76     | 0.014    | 0.80     | 0.0001   |
| % BDCA1+ cDC2s CD40+ | % BDCA2+ pDCs CD40+  | 0.78     | 0.001    | 0.57     | 0.516    | 0.37     | 1        |
| % BDCA1+ cDC2s CD86+ | % BDCA2+ pDCs CD40+  | 0.66     | 0.032    | 0.39     | 1        | 0.39     | 1        |
|                      | % BDCA3+ cDC1s CD86+ | 0.70     | 0.012    | 0.78     | 0.008    | 0.75     | 0.0008   |
| % BDCA2+ pDCs CD80+  | % BDCA2+ pDCs CD86+  | 0.17     | 1        | -0.48    | 1        | -0.71    | 0.003    |
| % BDCA2+ pDCs CD80+  | % BDCA3+ cDC1s CD80+ | 0.84     | <0.0001  | 0.71     | 0.046    | 0.76     | 0.0006   |
| % BDCA2+ pDCs CD86+  |                      | 0.33     | 1        | -0.34    | 1        | -0.73    | 0.002    |





**b****Tumor infiltrate**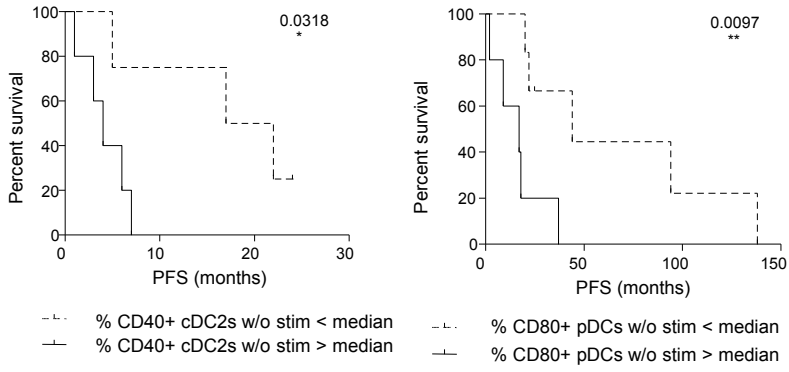**c**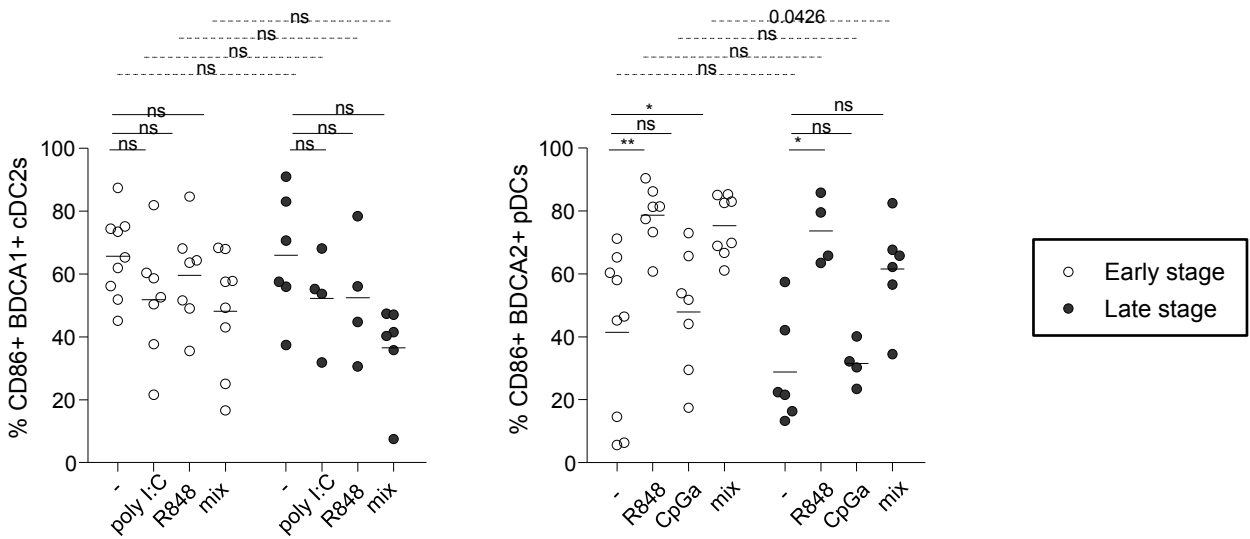**d**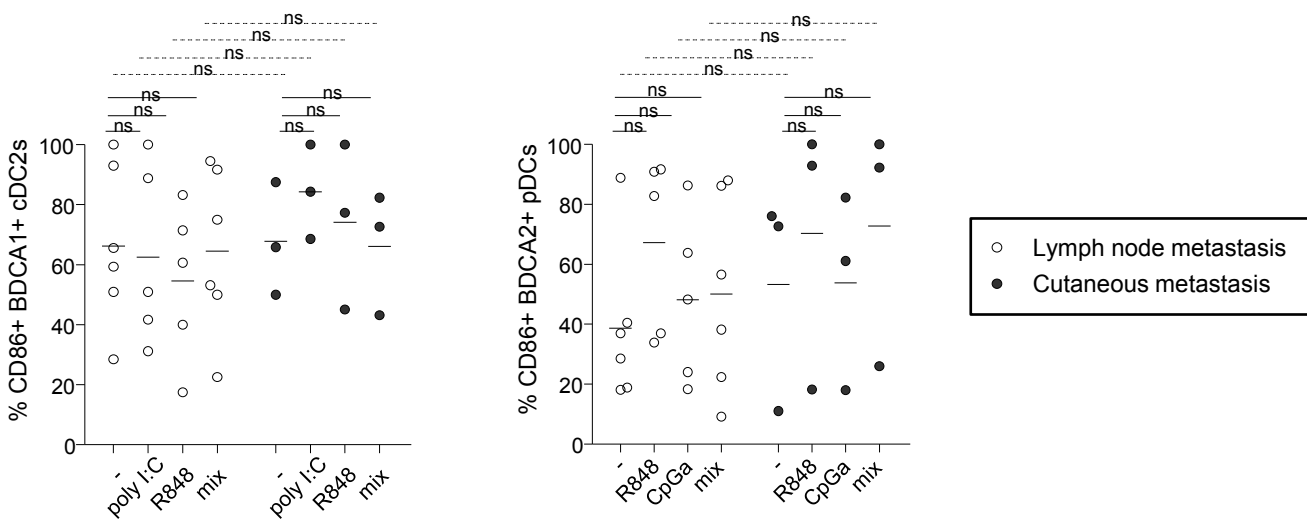

**e**

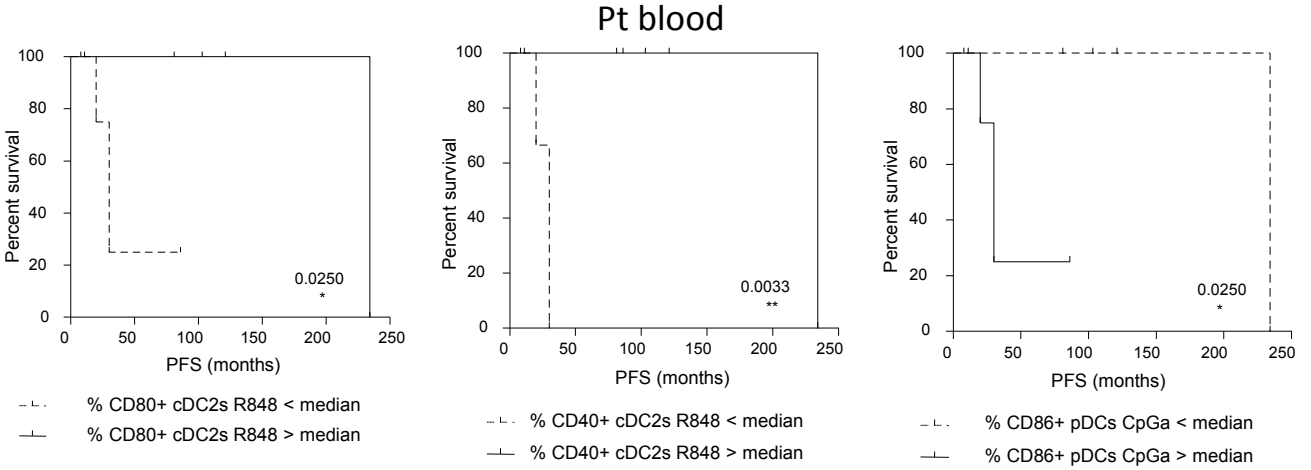

**f**

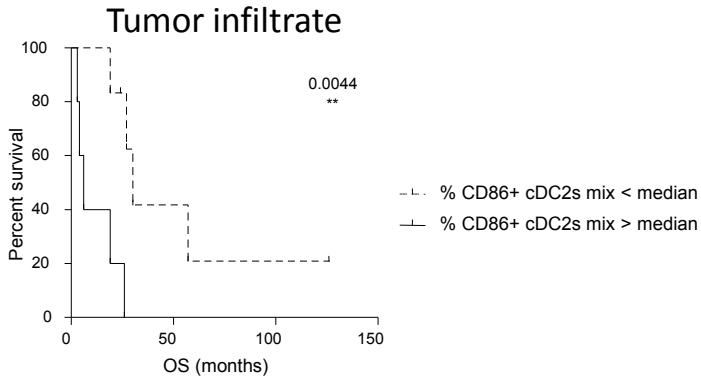

# Suppl Figure 5

**a**

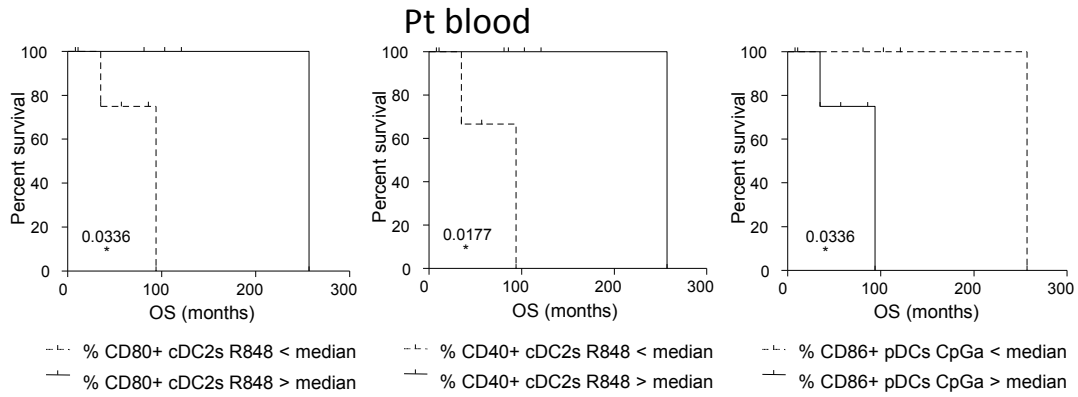

**b**

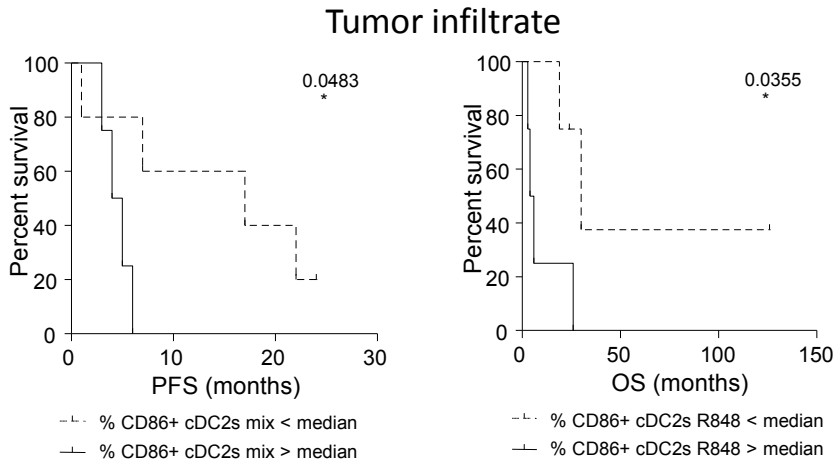

**c**

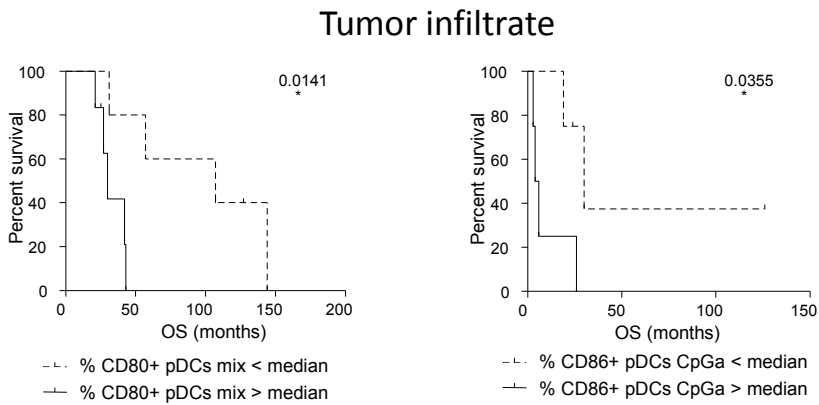

# Suppl Figure 6

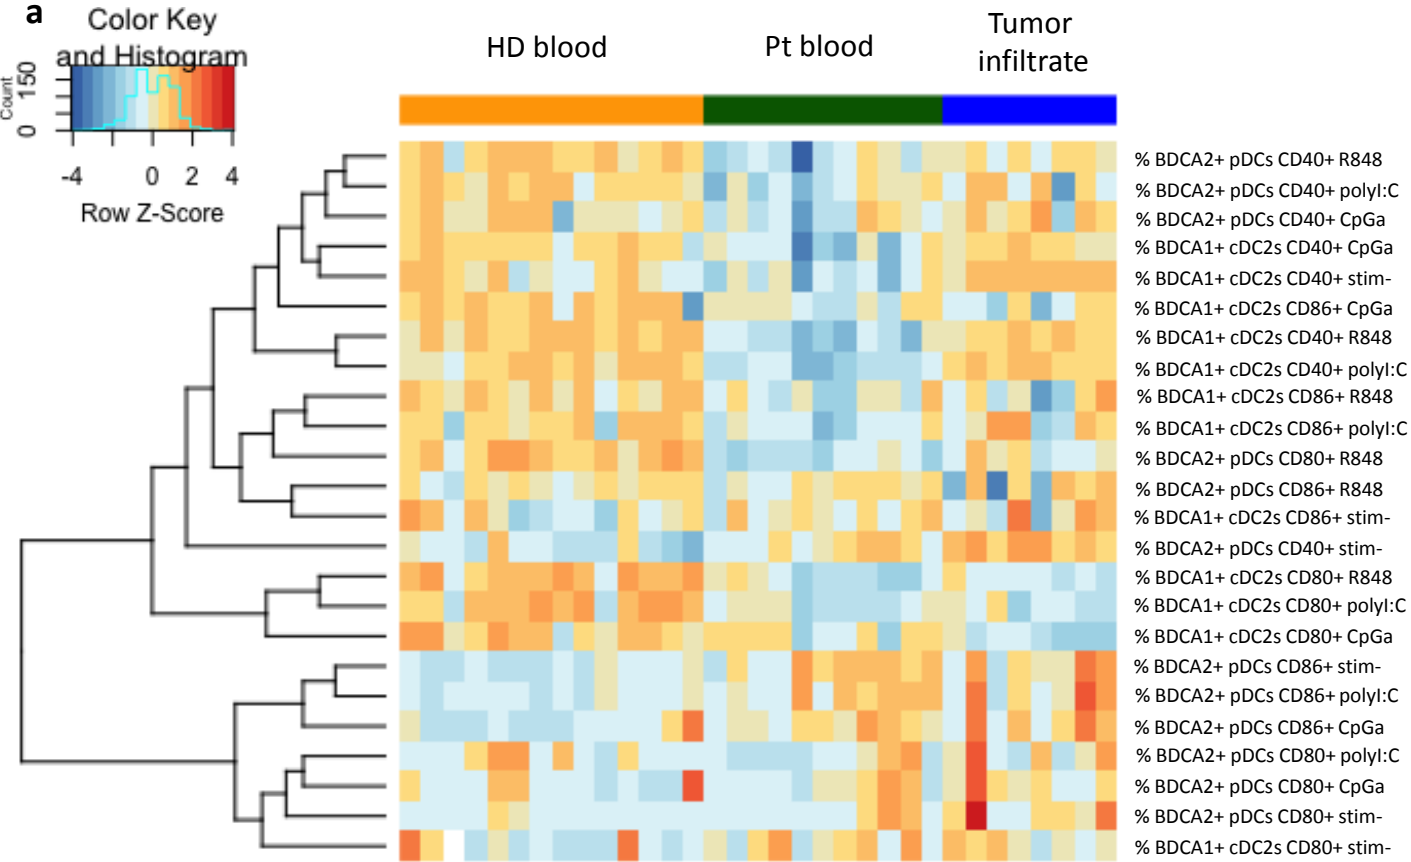

**b**

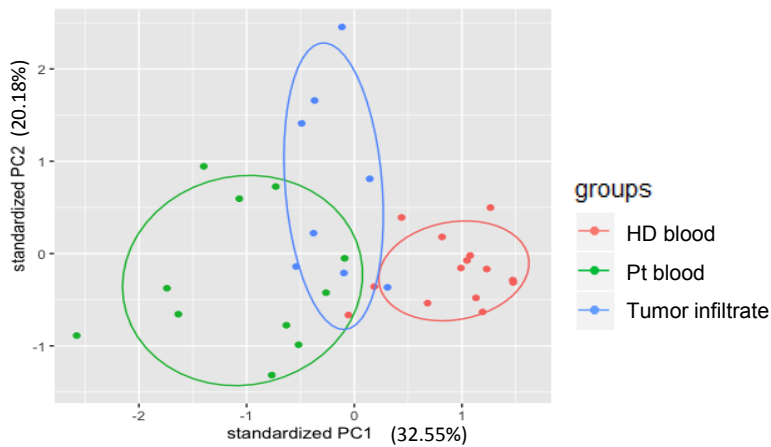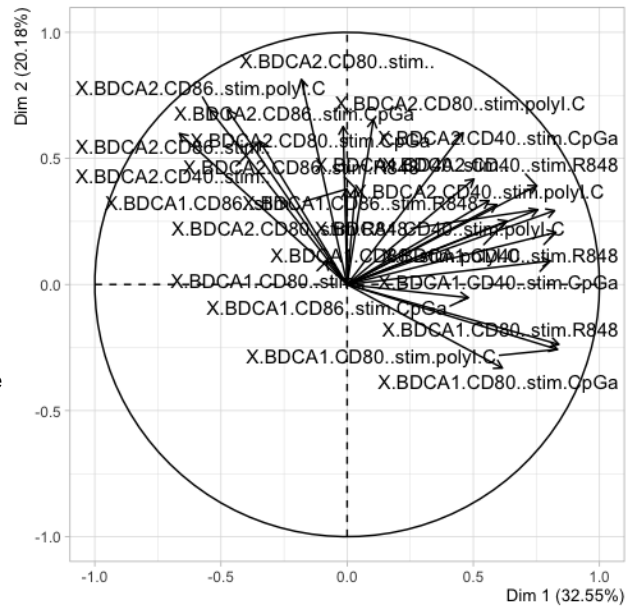

**c****BDCA1+ cDC2s**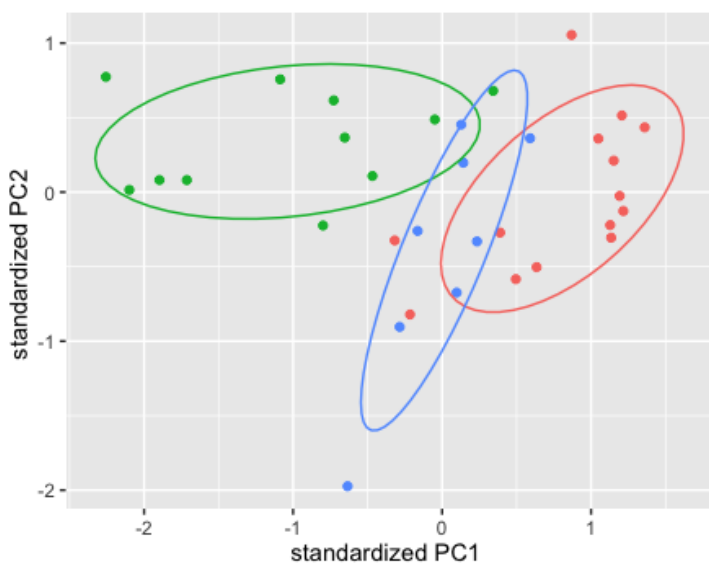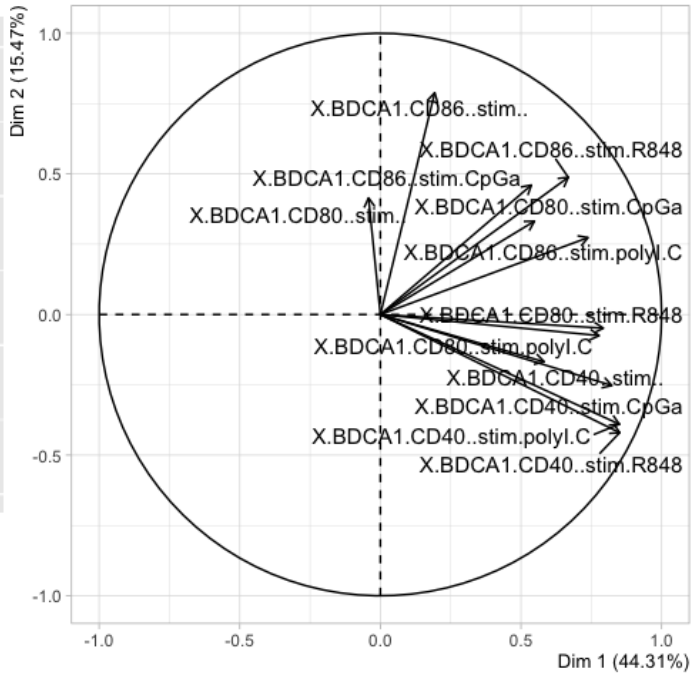**BDCA2+ pDCs**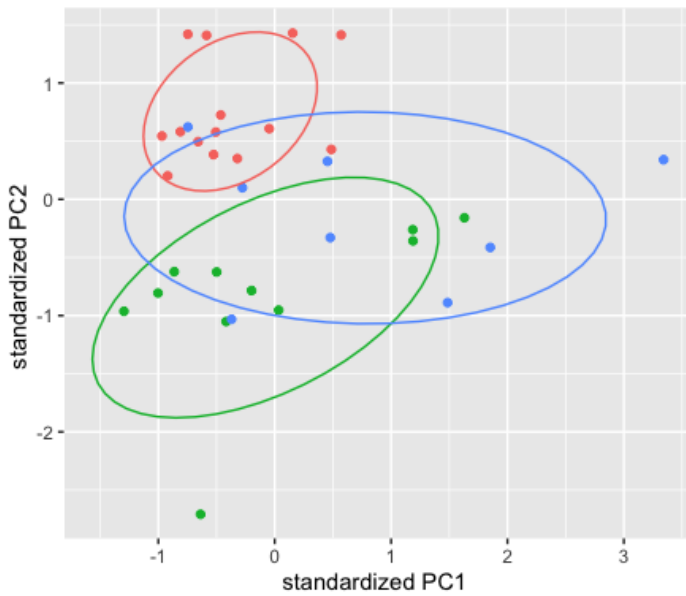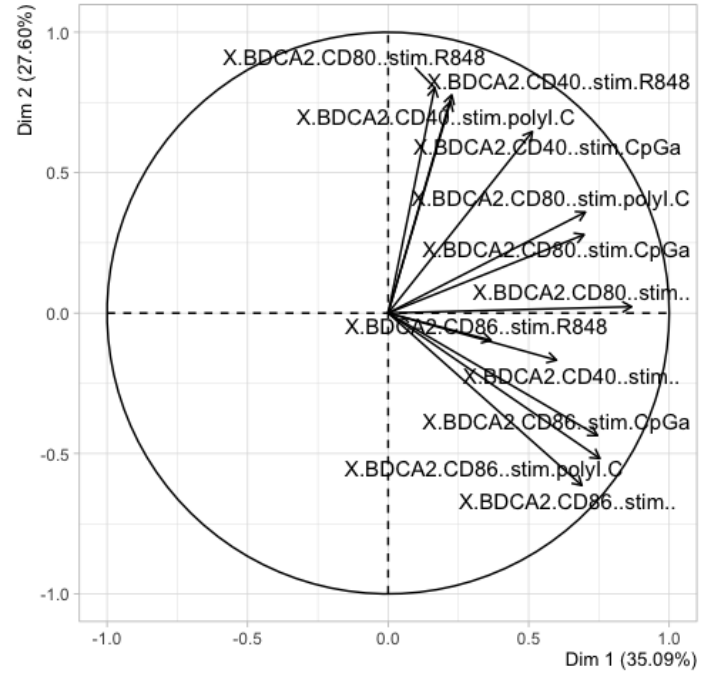**groups**

- HD blood
- Pt blood
- Tumor infiltrate

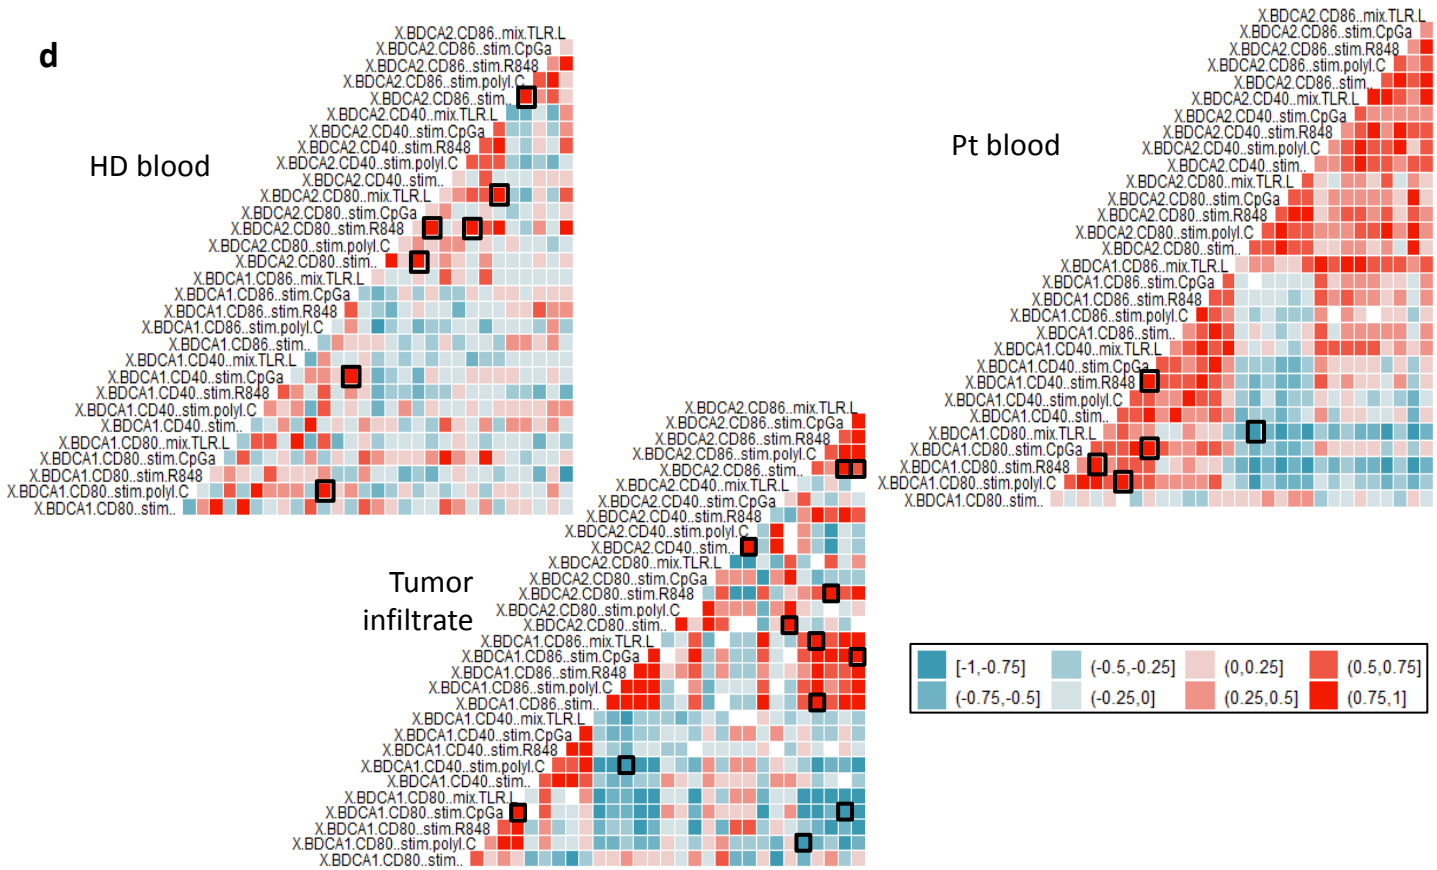

**e**

|             |            | Variables |             | HD blood   |        | Pt blood |       | Tumor infiltrate |         |         |
|-------------|------------|-----------|-------------|------------|--------|----------|-------|------------------|---------|---------|
|             |            |           |             | r          | p      | r        | p     | r                | p       |         |
| Intra-DCs   | cDC2s      | CD80+     | CD80+       | -0.55      | 1      | 0.65     | 1     | 0.95             | 0.027   |         |
|             |            | CD80+     | CD40+       | 0.84       | 0.067  | 0.90     | 0.035 | -0.09            | 1       |         |
|             |            | CD80+     | CD86+       | 0.89       | 0.012  | 0.26     | 1     | -0.20            | 1       |         |
|             |            | CD40+     | CD40+       | 0.47       | 1      | 0.90     | 0.035 | 0.75             | 1       |         |
|             |            | CD40+     | CD86+       | -0.47      | 1      | 0.57     | 1     | -1               | <0.001  |         |
|             |            | CD40+     | CD86+       | 0.93       | 0.0003 | -0.42    | 1     |                  |         |         |
|             |            | CD80+     | CD80+       | 0.83       | 0.038  | 0.83     | 0.291 | 0.59             | 1       |         |
|             |            | CD80+     | CD80+       | 0.88       | 0.006  | 0.87     | 0.121 | 0.81             | 1       |         |
|             |            | CD80+     | CD40+       | -0.04      | 1      | 0.27     | 1     | 1                | <0.0001 |         |
|             | pDCs       | CD80+     | CD40+       | 0.86       | 0.018  | 0.28     | 1     | 0.56             | 1       |         |
|             |            | CD80+     | CD40+       | 0.87       | 0.010  | 0.44     | 1     | 0.81             | 1       |         |
|             |            | CD80+     | CD86+       | 0.38       | 1      | 0.10     | 1     | 1                | <0.0001 |         |
|             |            | CD40+     | CD40+       | 0.22       | 1      | 0.40     | 1     | 1                | <0.0001 |         |
|             |            | CD86+     | CD86+       | 0.93       | 0.0003 | 0.79     | 0.586 | 0.93             | 0.089   |         |
|             |            |           | CD86+       | 0.72       | 0.526  | 0.59     | 1     | 0.95             | 0.027   |         |
|             |            |           | CD86+       | 0.16       | 1      | 0.55     | 1     | 0.98             | 0.003   |         |
|             |            | Inter-DCs | cDC2s CD80+ | pDCs CD80+ | -0.10  | 1        | -0.97 | 0.021            | -0.2    | 1       |
|             |            |           | cDC2s CD80+ | pDCs CD86+ | 0.03   | 1        | -0.43 | 1                | -1      | <0.0001 |
| cDC2s CD80+ | pDCs CD86+ |           | -0.05       | 1          | 0.93   | 0.23     | -1    | <0.0001          |         |         |
| cDC2s CD86+ | pDCs CD86+ |           | 0.43        | 1          | 0.30   | 1        | 1     | <0.0001          |         |         |
| cDC2s CD86+ | pDCs CD86+ |           | 0.09        | 1          | 0.27   | 1        | 1     | <0.0001          |         |         |
| cDC2s CD86+ | pDCs CD86+ |           | -0.04       | 1          | 0.60   | 1        | 1     | <0.0001          |         |         |

# Suppl Figure 7

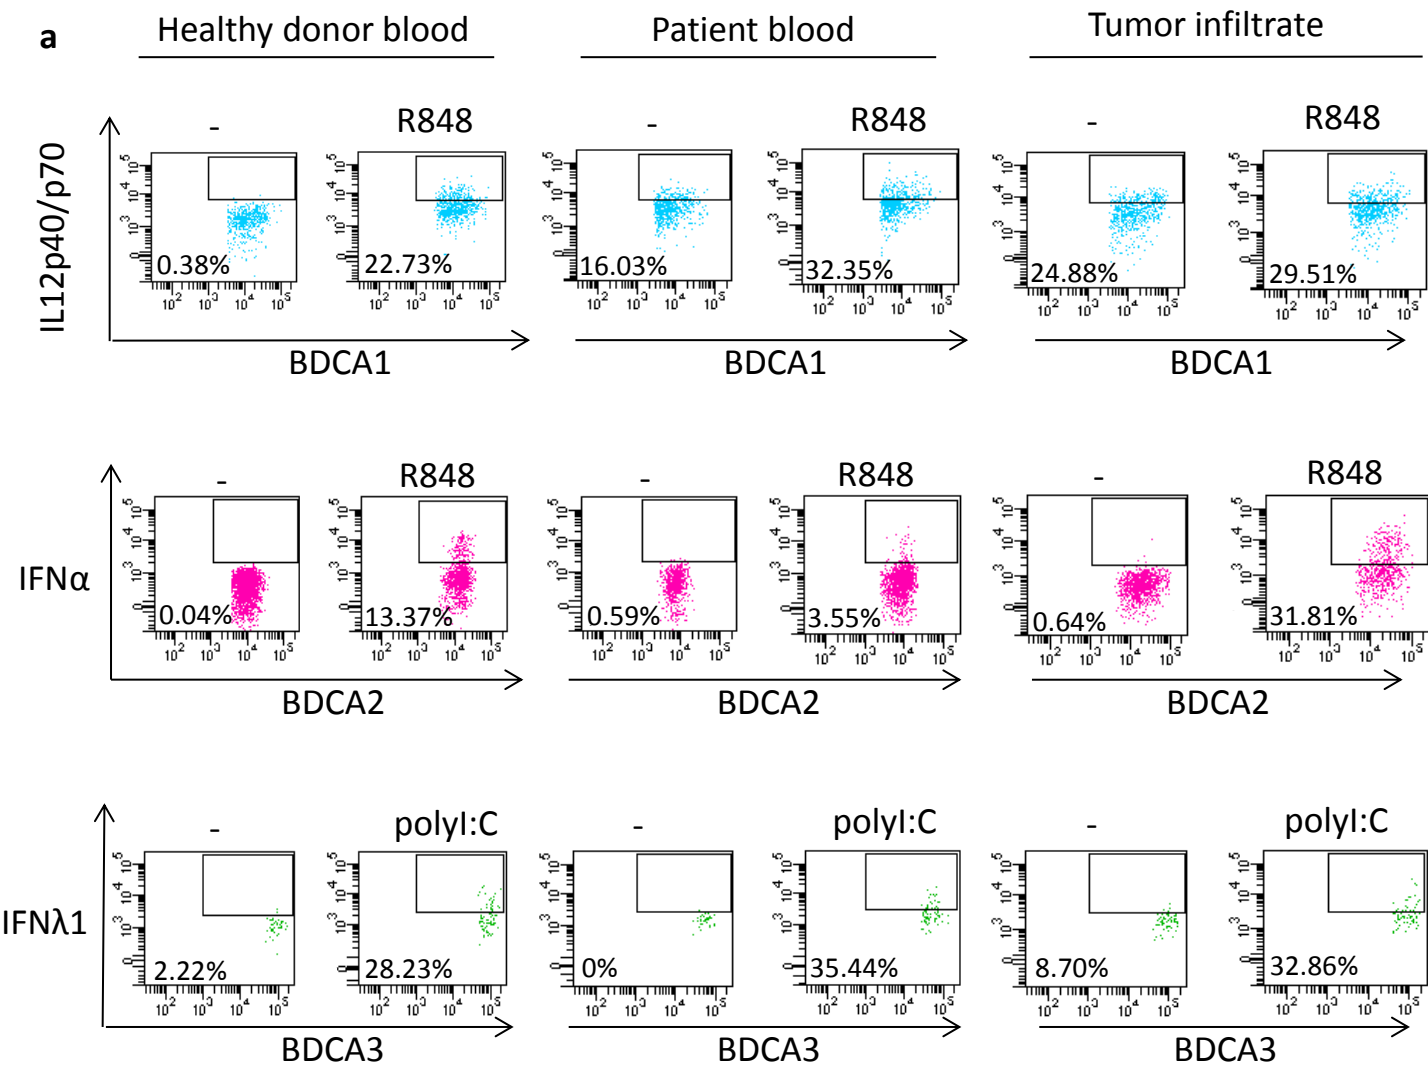

**b**

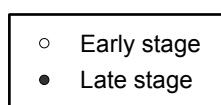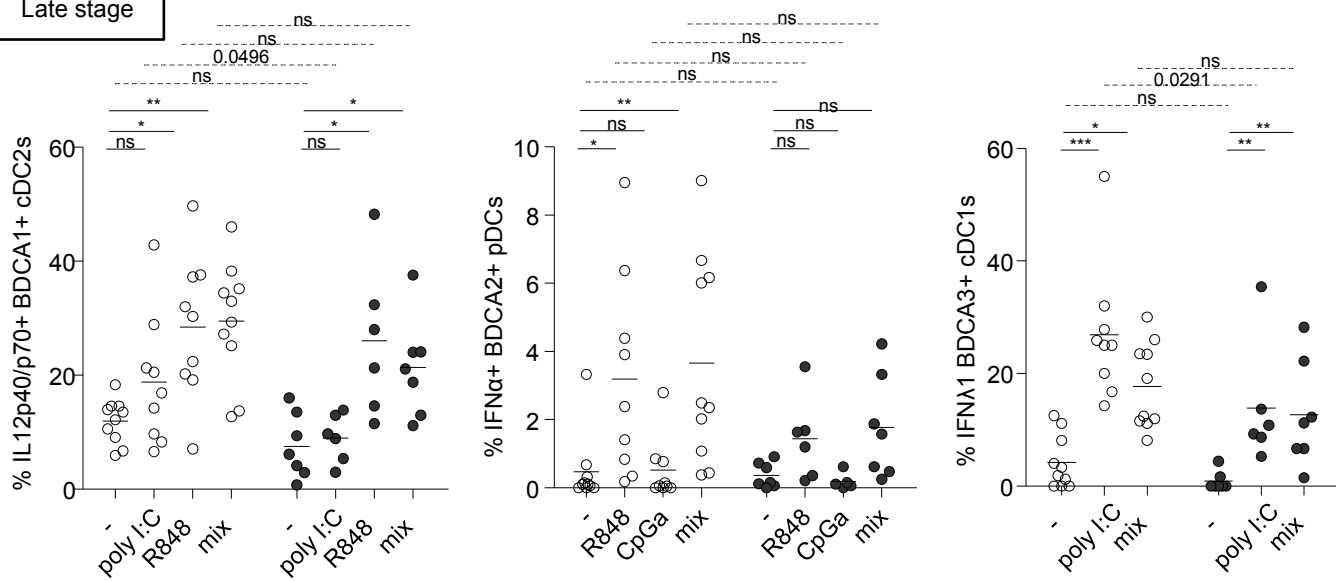



# Suppl Figure 8

**a**

## Tumor infiltrate

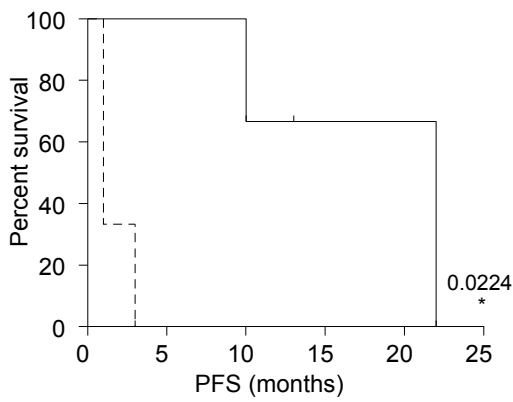

--- % TNF $\alpha$ + cDC2s R848 < median  
 — % TNF $\alpha$ + cDC2s R848 > median

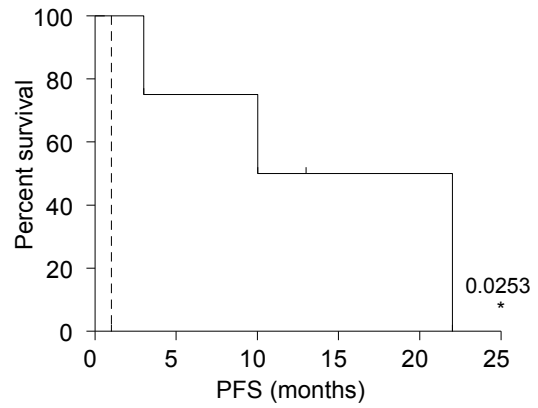

--- % IFN $\alpha$ + pDCs R848 < median  
 — % IFN $\alpha$ + pDCs R848 > median

**b**

○ Lymph node metastasis  
 ● Cutaneous metastasis

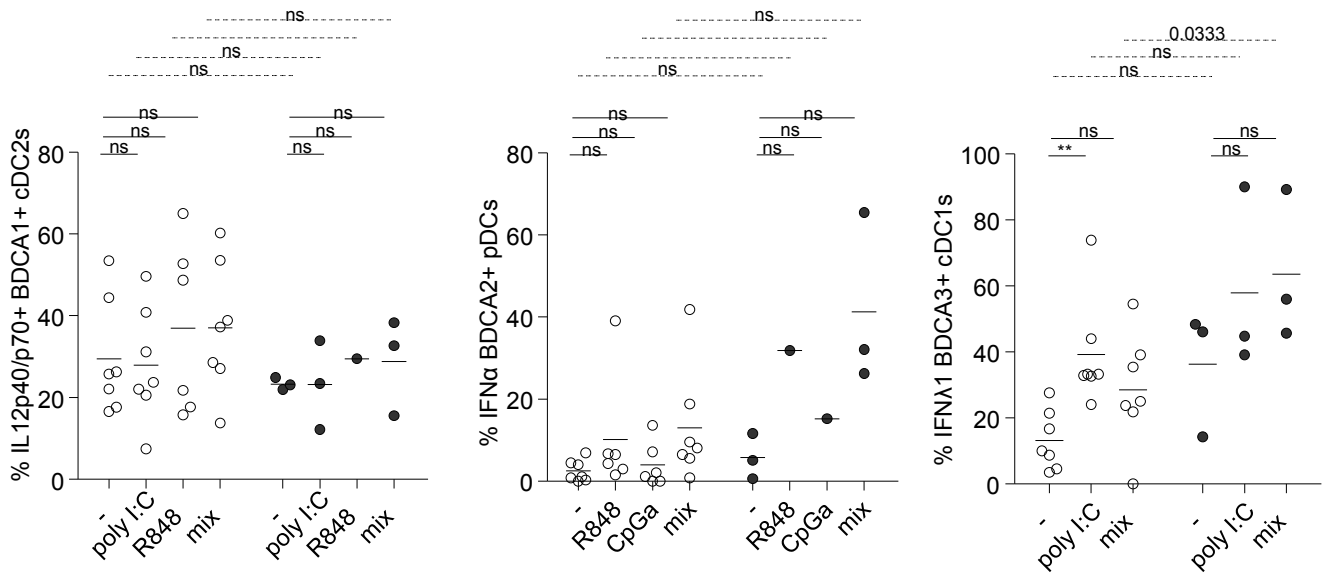

**c**

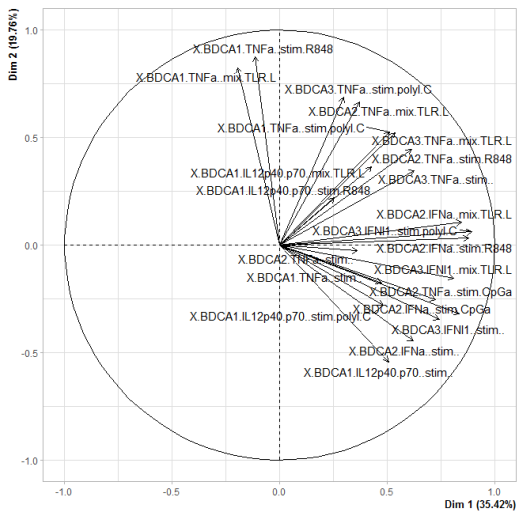

**d**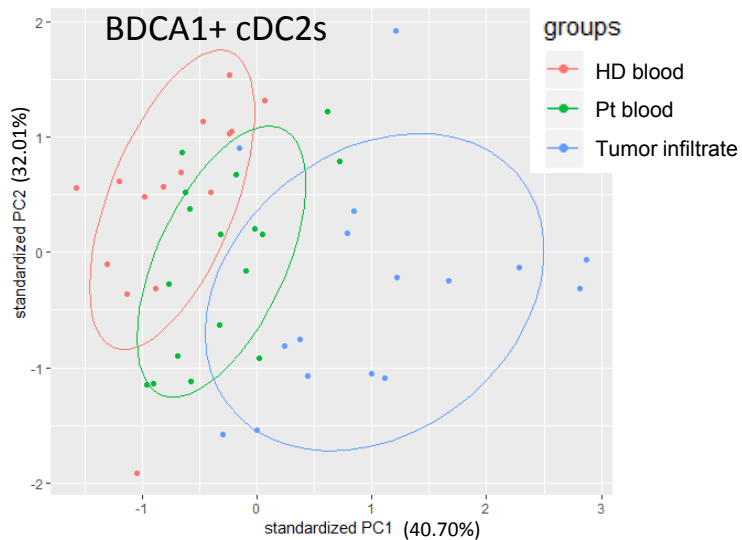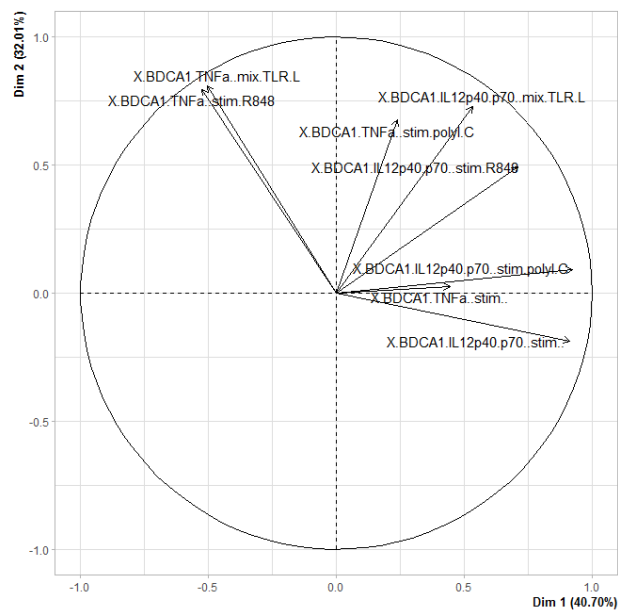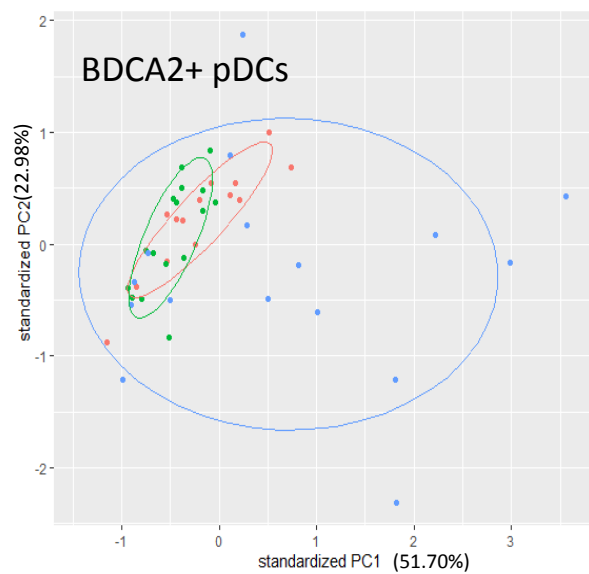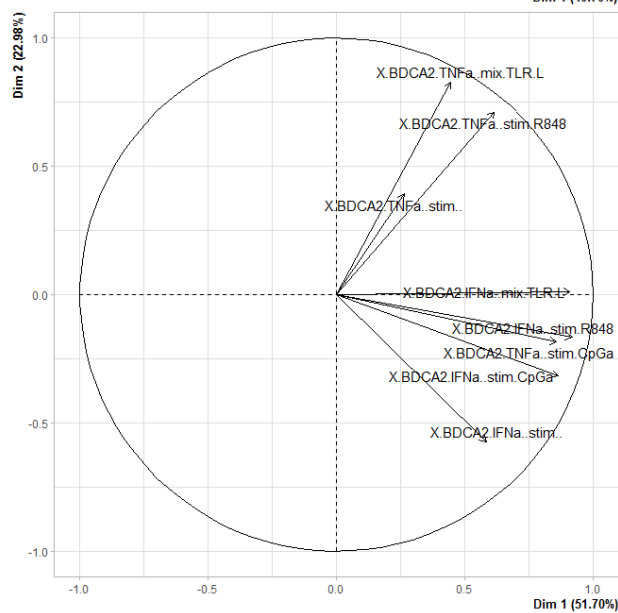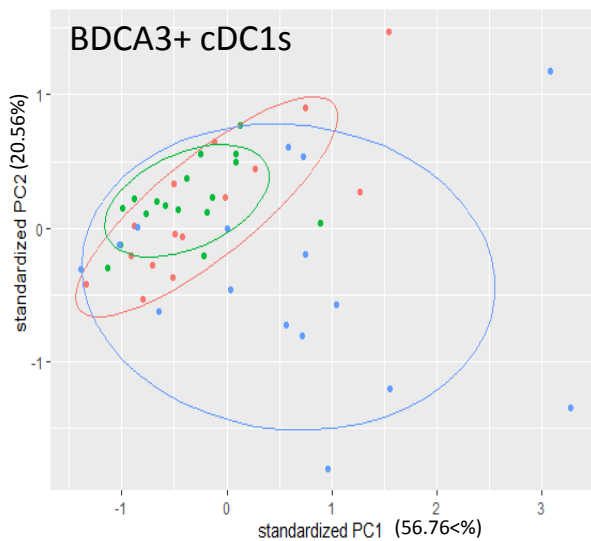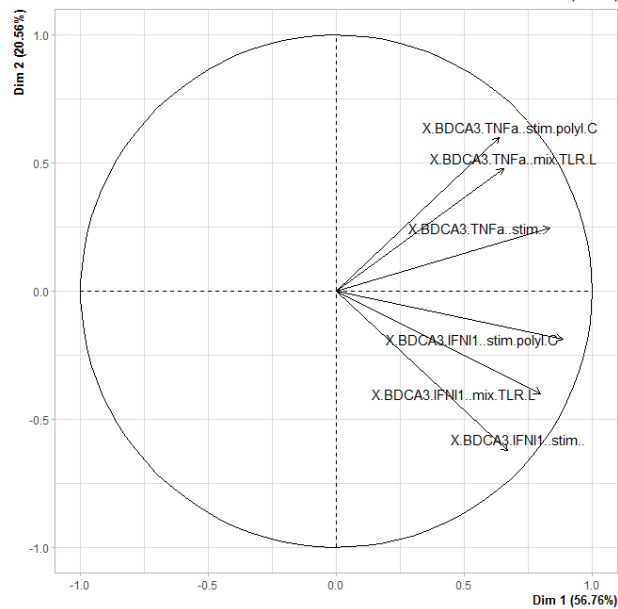

e

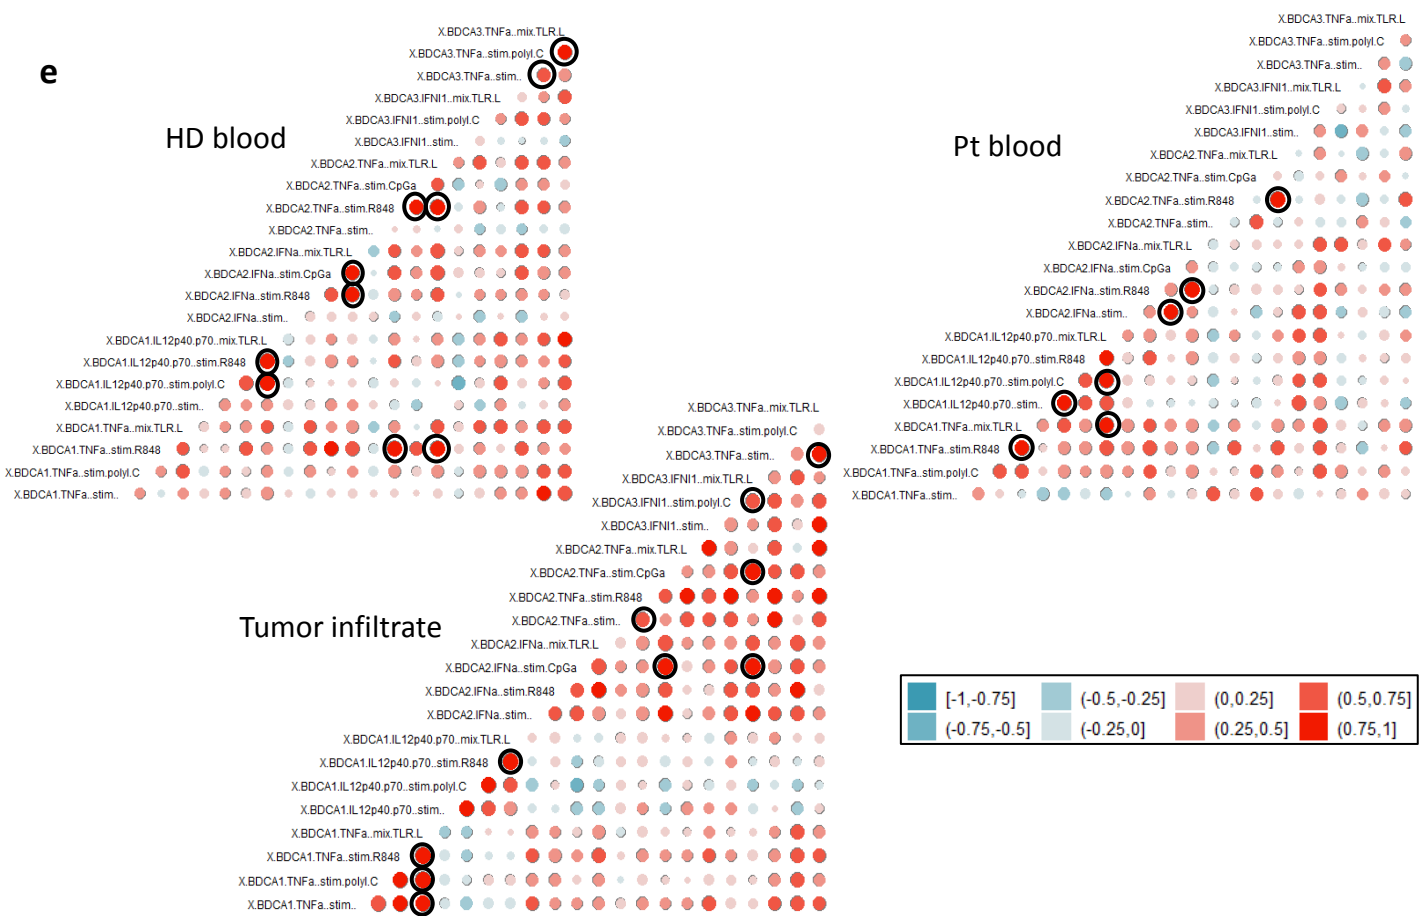

f

|           |           | Variables   |              | HD blood     |           | Pt blood |       | Tumor infiltrate |       |        |
|-----------|-----------|-------------|--------------|--------------|-----------|----------|-------|------------------|-------|--------|
|           |           |             |              | r            | p         | r        | p     | r                | p     |        |
| Intra-DCs | w/o stim  | cDC2s       | IL-12p40/p70 | IL-12p40/p70 | 0.39      | 1        | 0.81  | 0.007            | 0.76  | 0.234  |
|           |           |             | IL-12p40/p70 | IL-12p40/p70 | 0.88      | 0.002    | 0.80  | 0.009            | 0.68  | 0.550  |
|           |           |             | IL-12p40/p70 |              | 0.87      | 0.003    | 0.72  | 0.053            | 0.93  | 0.003  |
|           |           |             | IL-12p40/p70 |              | 0.54      | 1        | 0.76  | 0.023            | 0.006 | 1      |
|           |           |             | TNFα         | TNFα         | 0.62      | 0.153    | -0.39 | 1                | 0.86  | 0.003  |
|           |           |             | TNFα         |              | 0.64      | 0.450    | 0.49  | 1                | 0.95  | 0.0006 |
|           |           |             | TNFα         |              | 0.50      | 1        | 0.81  | 0.006            | 0.95  | 0.0006 |
|           | CpGa      | pDCs        | IFNα         | IFNα         | 0.13      | 1        | 0.78  | 0.023            | 0.72  | 0.410  |
|           |           |             | IFNα         | IFNα         | 0.85      | 0.006    | 0.87  | 0.001            | 0.78  | 0.196  |
|           |           |             | IFNα         |              | 0.82      | 0.016    | 0.39  | 1                | 0.74  | 0.334  |
|           |           |             | IFNα         | TNFα         | 0.39      | 1        | -0.13 | 1                | 0.97  | 0.0002 |
|           |           |             | TNFα         | TNFα         | -0.04     | 1        | 0.05  | 1                | 0.88  | 0.020  |
|           |           |             | TNFα         | TNFα         | 0.79      | 0.036    | 0.05  | 1                | 0.51  | 1      |
|           |           |             | TNFα         | TNFα         | 0.89      | 0.001    | 0.89  | 0.0004           | 0.82  | 0.103  |
|           | mix       | cDC1s       | IFNλ1        | IFNλ1        | 0.31      | 1        | 0.21  | 1                | 0.77  | 0.032  |
|           |           |             | TNFα         | TNFα         | 0.78      | 0.008    | 0.33  | 1                | 0.53  | 0.568  |
|           |           |             | TNFα         | TNFα         | 0.62      | 0.153    | -0.39 | 1                | 0.86  | 0.003  |
|           |           |             | TNFα         |              | 0.89      | 0.0001   | 0.38  | 1                | 0.42  | 0.695  |
| Inter-DCs |           |             | cDC2s TNFα   | pDCs TNFα    | pDCs TNFα | 0.87     | 0.022 | 0.55             | 1     | 0.43   |
|           | pDCs TNFα | pDCs TNFα   |              | 0.92         | 0.002     | 0.61     | 1     | 0.27             | 1     |        |
|           | pDCs IFNα | cDC1s IFNλ1 | 0.13         | 1            | 0.04      | 1        | 0.92  | 0.026            |       |        |
|           | pDCs TNFα |             | pDCs TNFα    | -0.46        | 1         | 0.37     | 1     | 0.96             | 0.002 |        |

# Suppl Figure 9

**a**

○ Early stage  
● Late stage

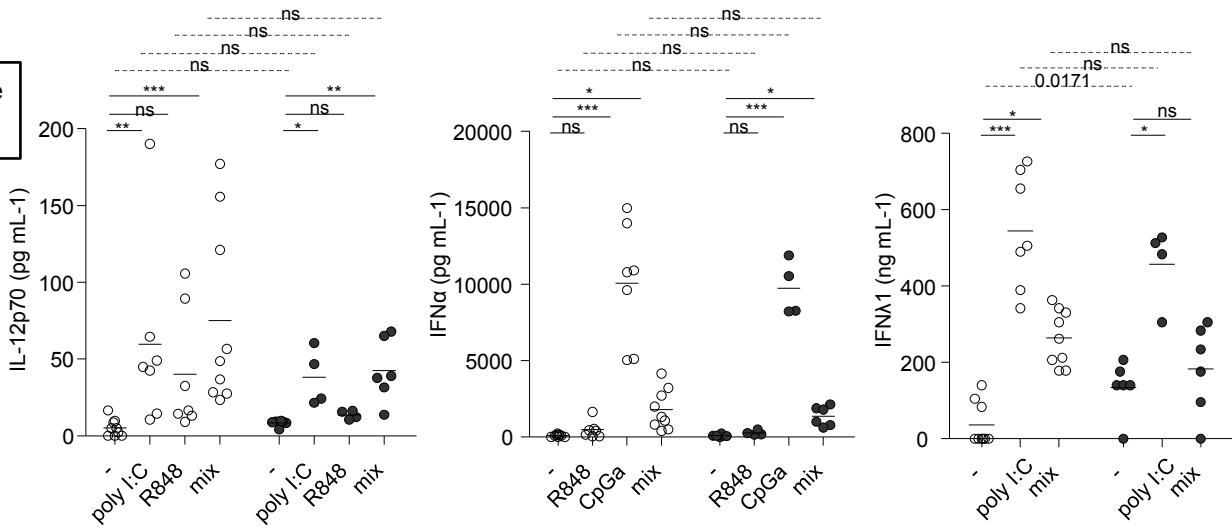

**b**

○ Lymph node metastasis  
● Cutaneous metastasis

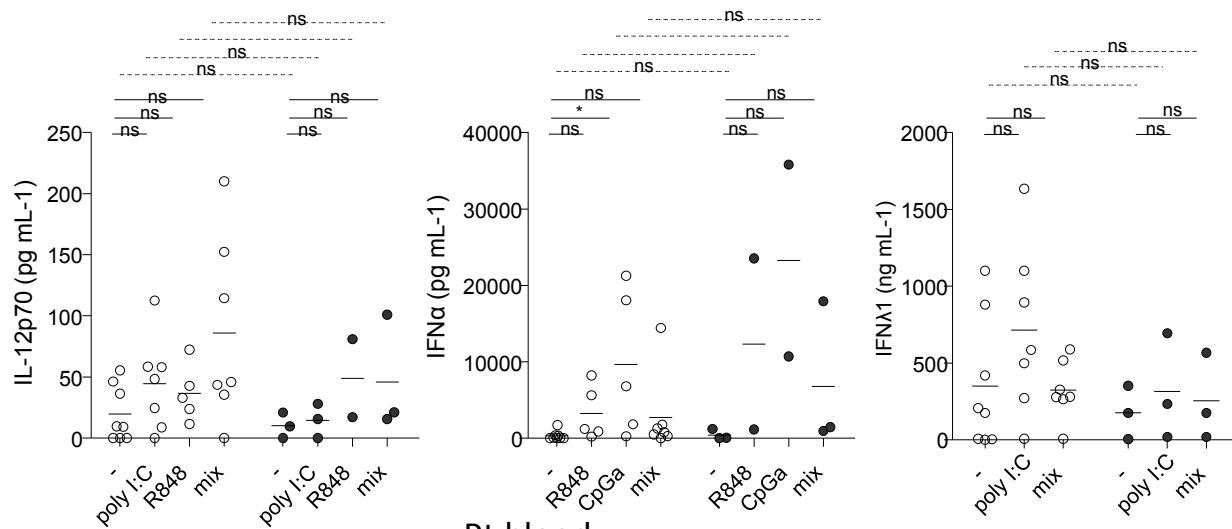

**c**

Pt blood

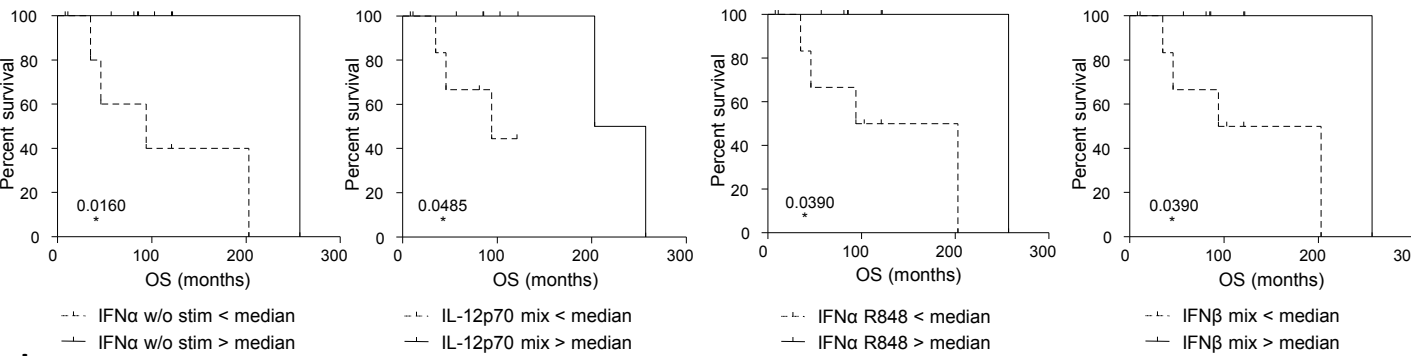

**d**

Tumor infiltrate

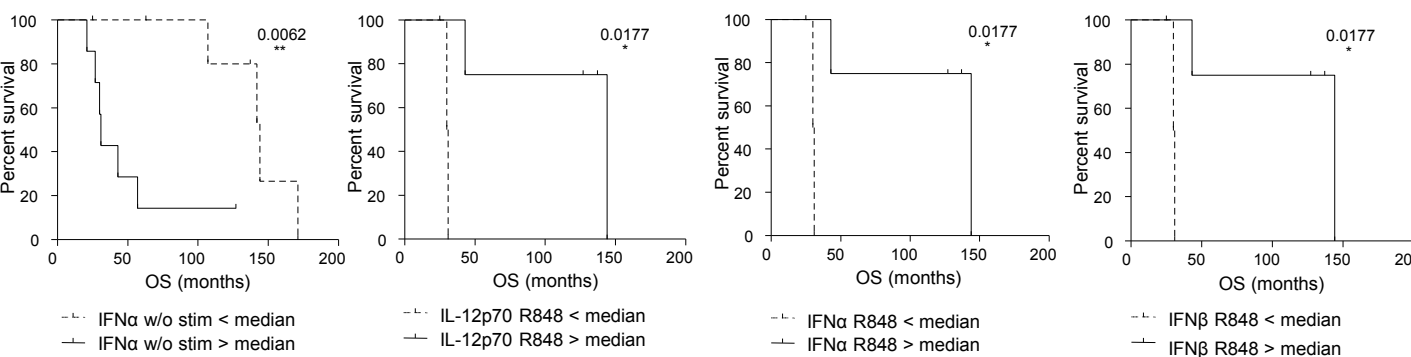

e

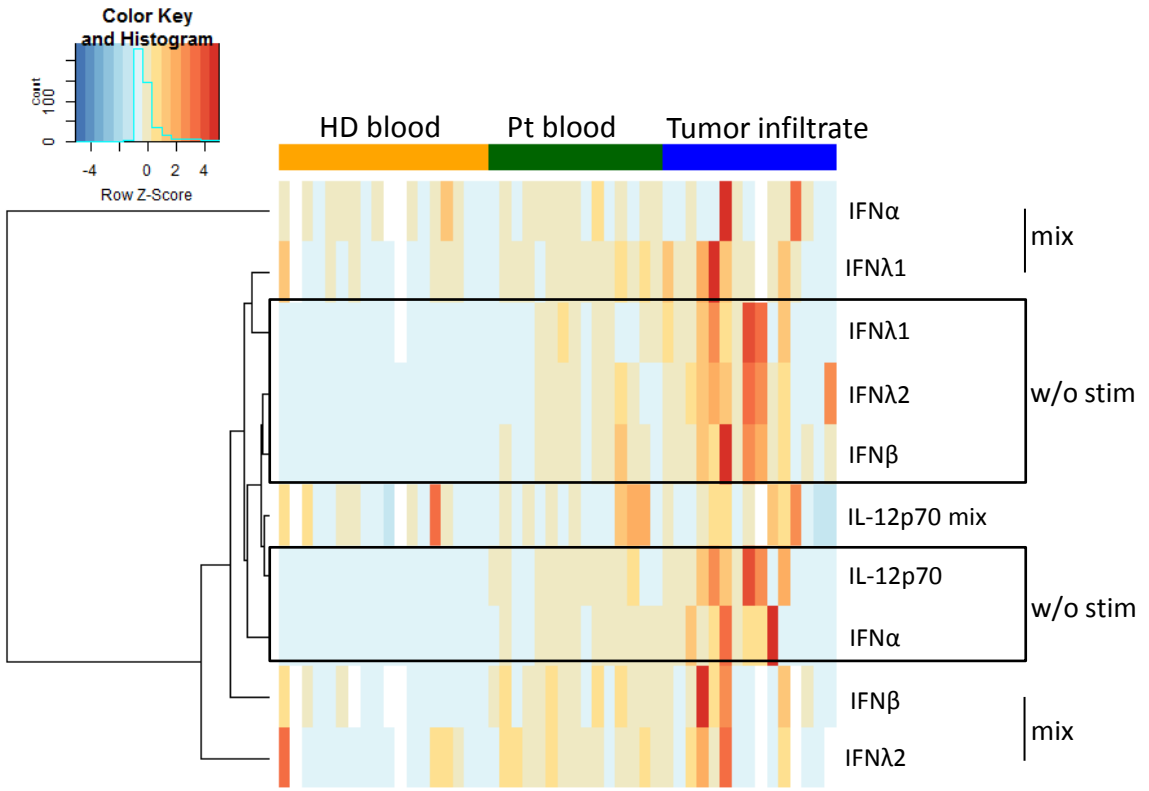

# Suppl Figure 10

**a**

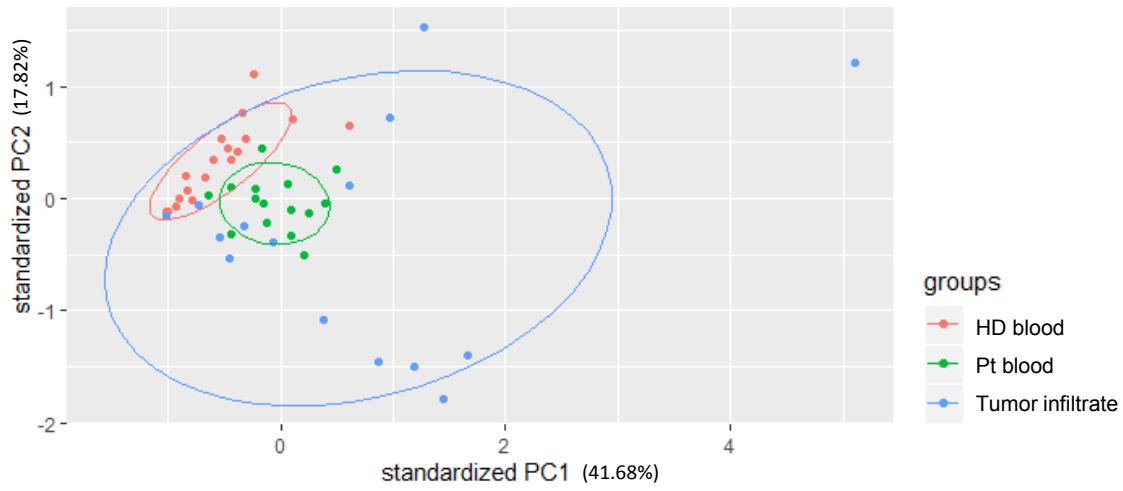

**b**

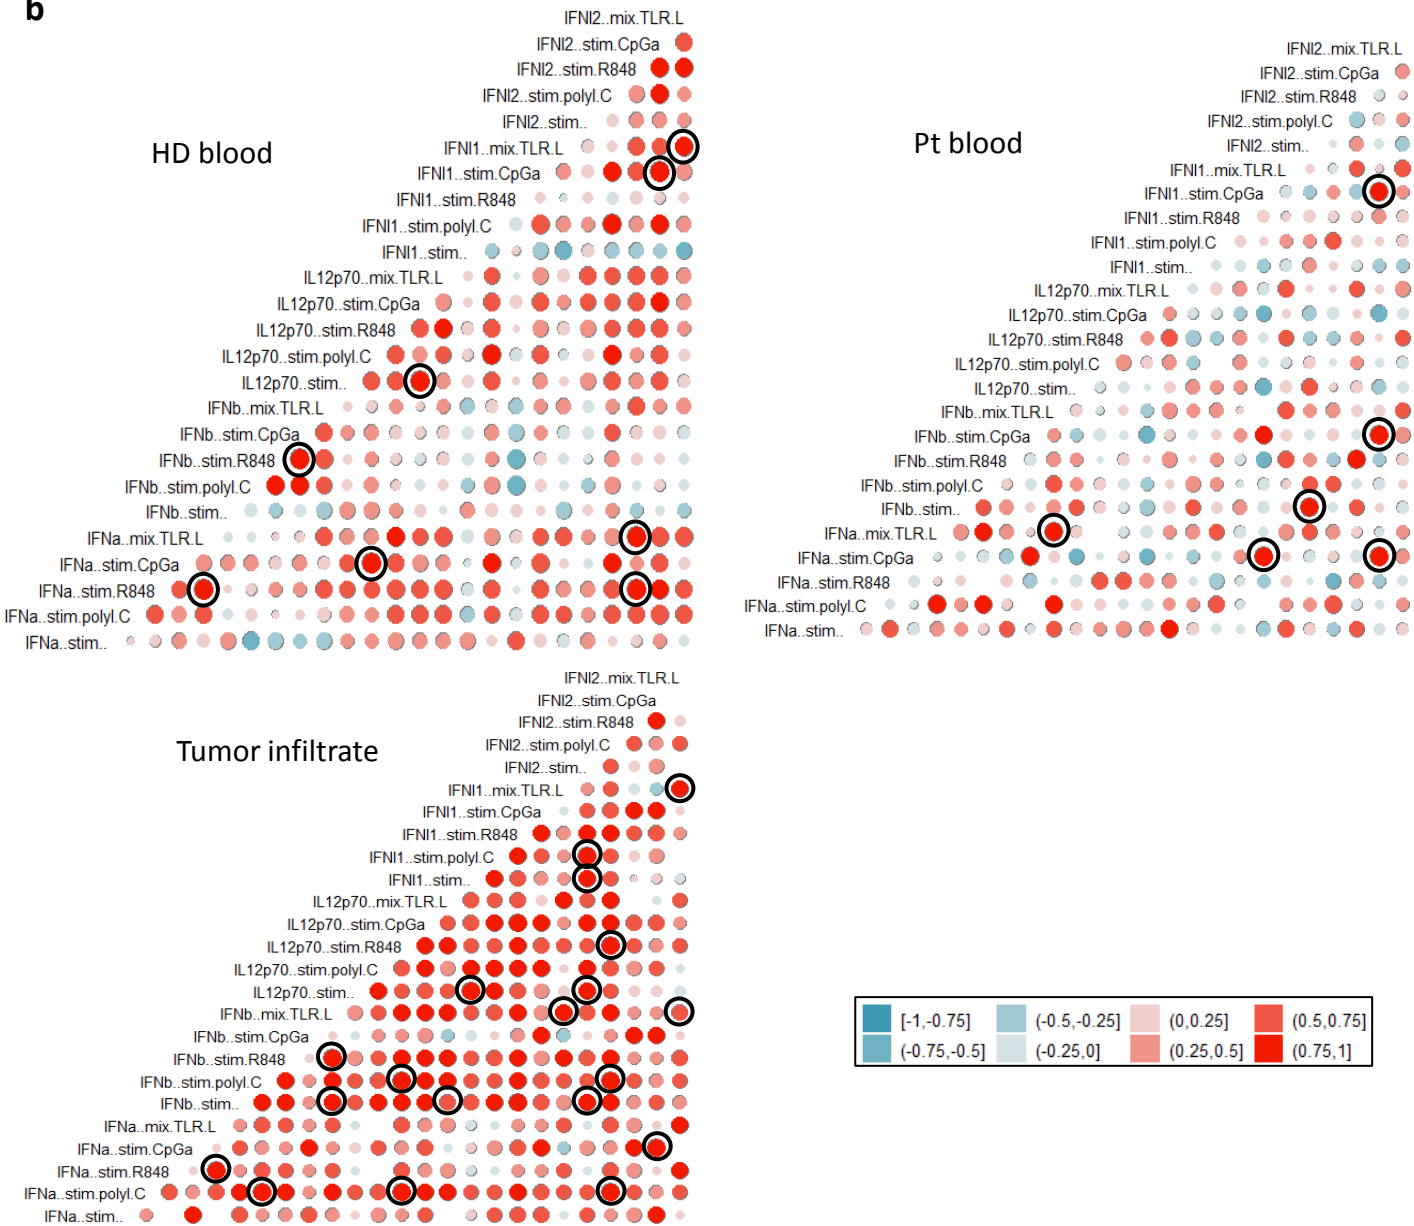

c

|          |
|----------|
| w/o stim |
| polyI:C  |
| R848     |
| CpGa     |
| mix      |

| Variables       |                 | HD blood |       | Pt blood |         | Tumor infiltrate |         |
|-----------------|-----------------|----------|-------|----------|---------|------------------|---------|
|                 |                 | r        | p     | r        | p       | r                | p       |
| IL-12p70        | IL-12p70        | 0.86     | 0.043 | -0.005   | 1       | 0.70             | 1       |
| IL-12p70        | IFN $\alpha$    | 0.91     | 0.006 | -0.03    | 1       | 0.30             | 1       |
| IL-12p70        | IFN $\alpha$    | 0.61     | 1     | -0.10    | 1       | 1                | <0.0001 |
| IL-12p70        | IFN $\beta$     | 0.09     | 1     | 0.34     | 1       | 0.80             | 0.042   |
| IL-12p70        | IFN $\beta$     | 0.066    | 1     | -0.15    | 1       | 1                | <0.0001 |
| IL-12p70        | IFN $\lambda$ 1 | 0.19     | 1     | 0.45     | 1       | 0.97             | <0.0001 |
|                 | IFN $\lambda$ 2 | 0.58     | 1     | 0.73     | 0.088   | 0.81             | 0.033   |
| IL-12p70        | IFN $\lambda$ 2 | 0.51     | 1     | -0.28    | 1       | 1                | <0.0001 |
| IFN $\alpha$    | IFN $\alpha$    | 0.87     | 0.028 | 0.03     | 1       | 1                | <0.0001 |
|                 | IFN $\beta$     | 0.60     | 0.882 | 0.92     | <0.0001 | 0.44             | 1       |
| IFN $\alpha$    | IFN $\beta$     | 0.14     | 1     | 0.86     | 0.178   | 1                | <0.0001 |
| IFN $\alpha$    | IFN $\lambda$ 1 | 0.71     | 1     | 0.93     | 0.012   | 0.90             | 1       |
| IFN $\alpha$    | IFN $\lambda$ 2 | 0.57     | 1     | 0.74     | 1       | 1                | <0.0001 |
| IFN $\alpha$    | IFN $\lambda$ 2 | 0.67     | 1     | 0.945    | 0.003   | 1                | <0.0001 |
| IFN $\alpha$    | IFN $\lambda$ 2 | 0.88     | 0.022 | 0.39     | 1       | 0.50             | 1       |
| IFN $\alpha$    |                 | 0.89     | 0.014 | 0.14     | 1       | 0.5              | 1       |
| IFN $\beta$     | IFN $\beta$     | -0.42    | 1     | 0.51     | 1       | 0.80             | 0.041   |
| IFN $\beta$     | IFN $\beta$     | 0.70     | 1     | 0.40     | 1       | 1                | <0.0001 |
| IFN $\beta$     |                 | 0.88     | 0.018 | 0.18     | 1       | 0.10             | 1       |
| IFN $\beta$     | IFN $\lambda$ 1 | 0.39     | 1     | 0.61     | 0.545   | 0.88             | 0.002   |
| IFN $\beta$     | IFN $\lambda$ 2 | 0.22     | 1     | 0.84     | 0.003   | 0.93             | 0.0002  |
| IFN $\beta$     | IFN $\lambda$ 2 | 0.48     | 1     | 0.53     | 1       | 1                | <0.0001 |
| IFN $\beta$     | IFN $\lambda$ 2 | 0.24     | 1     | 0.96     | 0.0006  | 0.90             | 1       |
| IFN $\beta$     | IFN $\lambda$ 2 | 0.43     | 1     | 0.60     | 0.663   | 0.90             | 0.0015  |
| IFN $\lambda$ 1 | IFN $\lambda$ 2 | 0.23     | 1     | 0.61     | 0.550   | 0.80             | 0.037   |
| IFN $\lambda$ 1 |                 | 0.26     | 1     | 0.29     | 1       | 1                | <0.0001 |
| IFN $\lambda$ 1 | IFN $\lambda$ 2 | 0.88     | 0.022 | 0.90     | 0.047   | 0.90             | 1       |
| IFN $\lambda$ 1 | IFN $\lambda$ 2 | 0.85     | 0.006 | 0.73     | 0.08    | 0.81             | 0.030   |

# Suppl Figure 11

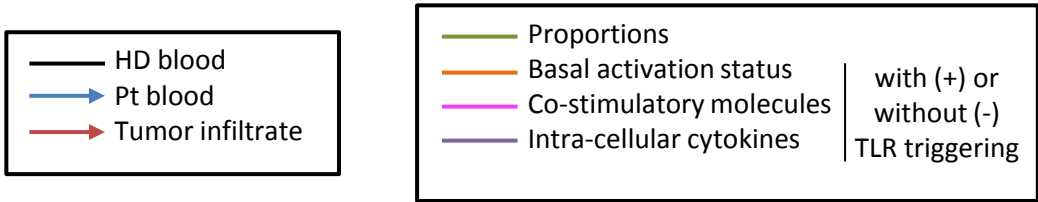

BDCA1+  
cDC2s

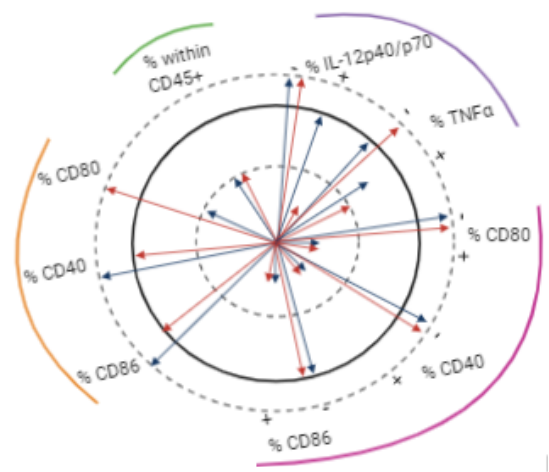

BDCA2+  
pDCs

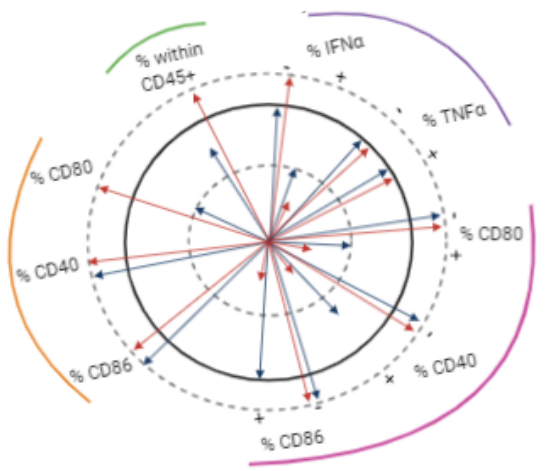

BDCA3+  
cDC1s

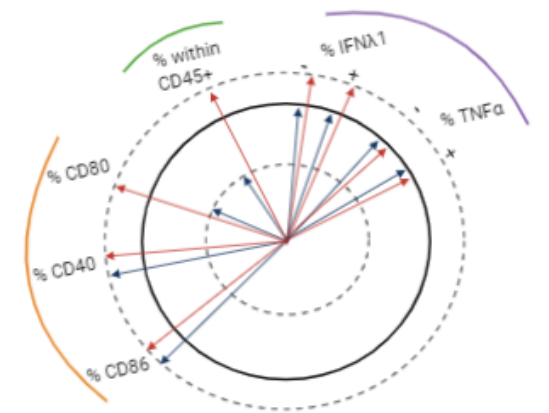



# Suppl Figure 12

| Blood                     |                     | BDCA1+ cDC2s | BDCA2+ pDCs | BDCA3+ cDC1s |
|---------------------------|---------------------|--------------|-------------|--------------|
| Frequency                 |                     | --           | -           | --           |
| <i>In situ</i> activation |                     | ++           | ++          | + / ++       |
| After TLR triggering      | Activation status   | ---          | -           |              |
|                           | Cytokine production | -            | --          | +            |

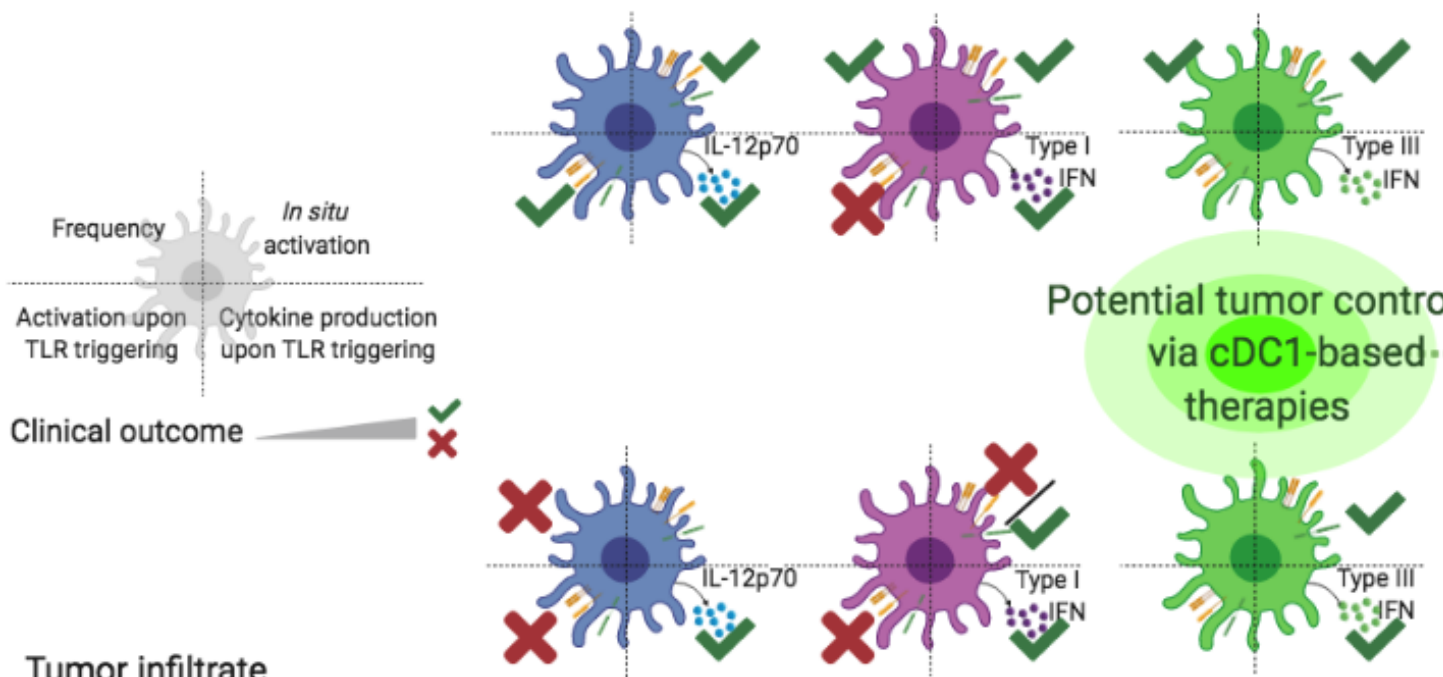

| Tumor infiltrate          |                     | BDCA1+ cDC2s | BDCA2+ pDCs | BDCA3+ cDC1s |
|---------------------------|---------------------|--------------|-------------|--------------|
| Frequency                 |                     | --           | +++         | ++           |
| <i>In situ</i> activation |                     | + / ++       | ++          | ++ / +++     |
| After TLR triggering      | Activation status   | ---          | ---         |              |
|                           | Cytokine production | ---          | ---         | ++           |

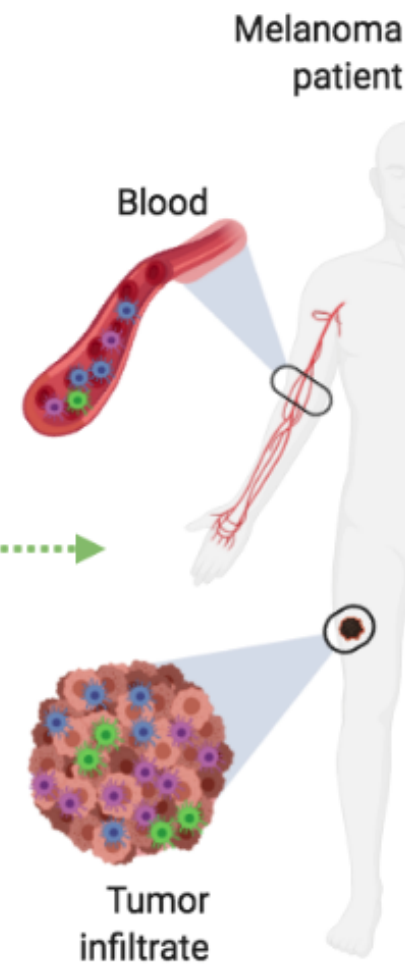

Supplementary Table 1: Clinical features of patients from whom blood samples were used

| Patient clinical features |             |     |     |              |           |         |                                     |                                       | From diagnosis time |      | From sampling time |      |
|---------------------------|-------------|-----|-----|--------------|-----------|---------|-------------------------------------|---------------------------------------|---------------------|------|--------------------|------|
| #                         | sample type | sex | age | Breslow (mm) | Clark     | Ulcer   | treatment before sampling           | TNM classification (at sampling time) | PFS                 | OS   | PFS                | OS   |
| 1                         | PBMC        | F   | 38  | 3            | IV        | yes     | no                                  | IIIb (T3b N1a M0)                     | 41                  | 46   | 41                 | 46   |
| 2                         | PBMC        | F   | 48  | 1.6          | IV        | yes     | no                                  | IIa (T2b N0 M0)                       | >122                | >122 | >122               | >122 |
| 3                         | PBMC        | M   | 62  | 1.2          | III       | ND      | no                                  | Ib ou IIa (T2 N0 M0)                  | >121                | >121 | >120               | >120 |
| 4                         | PBMC        | M   | 73  | 0.71 / 0.95  | III / ND  | no / no | surgery                             | Ia (T1a N0 M0) or Ib (T1b N0 M0)      | >43                 | 203  | >75                | 171  |
| 5                         | PBMC        | M   | 66  | 1.9          | IV        | yes     |                                     | IIa (T2b N0 M0)                       | >185                | >185 | >184               | >184 |
| 6                         | PBMC        | F   | 41  | 2.8          | III       | no      | surgery; chemotherapy; IFN $\alpha$ | IV (T3a N1b M1a)                      | 4                   | 23   | 3                  | 9    |
| 7                         | PBMC        | M   | 48  | 1.35         | III       | no      | no                                  | IIIa (T2a N2a M0)                     | >103                | >103 | >102               | >102 |
| 8                         | PBMC        | M   | 89  | 4 / 2        | ND / IV   | ND      | surgery                             | IV (T3 Nx M1a)                        | 234                 | 257  | 11                 | 23   |
| 9                         | PBMC        | M   | 35  | 1            | IV        | no      | no                                  | IIIa (T1a N1a M0)                     | >121                | >121 | >120               | >120 |
| 10                        | PBMC        | F   | 42  | 1.05         | IV        | no      | surgery                             | IIIb (T2a N2c M0)                     | 22                  | >85  | >85                | >85  |
| 11                        | PBMC        | F   | 80  | 4.1          | IV        | yes     | no                                  | IIc (T4b N0 M0)                       | 20                  | 94   | 19                 | 93   |
| 12                        | PBMC        | F   | 45  | 0.54         | III       | no      | no                                  | Ia (T1a N0 M0)                        | >8                  | >8   | >8                 | >8   |
| 13                        | PBMC        | F   | 49  | 0.4 / 1.62   | III / III | ND      | surgery                             | IV (T2a N1 M1c)                       | 30                  | 35   |                    | 5    |
| 14                        | PBMC        | F   | 64  | 3            | IV        | ND      | no                                  | IIa (T3a N0 M0)                       | >86                 | >86  | >85                | >85  |
| 15                        | PBMC        | F   | 72  | 1.1          | IV        | no      | no                                  | Ib (T2a N0 M0)                        | >11                 | >11  | >10                | >10  |
| 16                        | PBMC        | F   | 61  | 2.6          | IV        | yes     | no                                  | IIb (T3b N0 M0)                       | 30                  | >57  | 30                 | >57  |
| 17                        | PBMC        | F   | 45  | 1.5          | IV        | no      | no                                  | Ib (T2a N0 M0)                        | >81                 | >81  | >81                | >81  |

ND: not determined

Supplementary Table 2: Clinical features of patients from whom tumor samples were used

| Patient clinical features |                                           |     |     |              |       |       |                                                   |                                       | From diagnosis time |      | From sampling time |      |
|---------------------------|-------------------------------------------|-----|-----|--------------|-------|-------|---------------------------------------------------|---------------------------------------|---------------------|------|--------------------|------|
| #                         | sample type                               | sex | age | Breslow (mm) | Clark | Ulcer | treatment before sampling                         | TNM classification (at sampling time) | PFS                 | OS   | PFS                | OS   |
| 18                        | primary tumor or sub-cutaneous metastasis | F   | 80  | ND           | ND    | ND    | no                                                | IIIc (TxN3M0)                         |                     | 42   |                    | 42   |
| 19                        | lymph node metastasis                     | M   | 26  | 2.64         | IV    | ND    | surgery; IFN; radiotherapy                        | IV (T3aN3M1a)                         | 14                  | 84   | 12                 | 31   |
| 20                        | ND                                        | F   | 51  | 0.8          | III   | no    | no                                                |                                       | 50                  |      |                    |      |
| 21                        | lymph node metastasis                     | F   | 69  | 0.78         | III   | ND    | surgery; chemotherapy; vaccination (DC MEL 201)   | IV (T1a Nx M1a)                       | 44                  | 107  | 6                  | 19   |
| 22                        | lymph node metastasis                     | M   | 25  | ND           | ND    | ND    | no                                                |                                       |                     | 31   |                    | 30   |
| 23                        | primary tumor or lymph node metastasis    | M   | 62  | 1.4          | III   | yes   | no                                                | IIIc (T2b N1b M0)                     | 17                  | 27   | 17                 | 27   |
| 24                        | ND                                        | F   | 72  | 3.09         | IV    | yes   | no                                                |                                       | 4                   |      |                    |      |
| 25                        | ND                                        | M   | 39  | 9            | IV    | yes   | surgery                                           |                                       | 22                  | 57   | 22                 | 57   |
| 26                        | ND                                        | F   | 68  | 6            | V     | no    | no                                                |                                       | 94                  |      |                    |      |
| 27                        | sub-cutaneous metastasis                  | F   | 67  | 1.3          | III   | no    | surgery                                           | IV (T2a N0 M1a)                       | 37                  | 43   | 3                  | 3    |
| 28                        | primary tumor                             | M   | 66  | 14           | V     | ND    | no                                                | IIIb or IIIc (T4 N2c M0)              | 13                  | 23   | 2                  | 11   |
| 29                        | ND                                        | M   | 46  | 1.4          | IV    | no    | no                                                |                                       | 160                 | 213  | 36                 | 58   |
| 30                        | primary tumor                             | F   | 42  | 0.9          | III   | no    | no                                                | Ia (T1a N0 M0)                        | >25                 | >25  | >24                | >24  |
| 31                        | lymph node metastasis                     | M   | 56  | 8            | IV    | ND    | IFN $\alpha$                                      | IV (T1a N3 M1c)                       | 113                 | 117  | 4                  | 4    |
| 32                        | lymph node metastasis                     | M   | 50  | 1.5          | III   | no    | surgery                                           |                                       | 20                  | 30   |                    | 26   |
| 33                        | lymph node metastasis                     | M   | 33  | 6.9          | IV    | no    | surgery                                           | IV (T4a N3 M1c)                       | 62                  | 74   | 10                 | 10   |
| 34                        | lymph node metastasis                     | F   | 61  | 4.1          | IV    | yes   | no                                                | IIIc (T4b N1b M0)                     | 2                   | >127 | 1                  | >126 |
| 35                        | lymph node metastasis                     | F   | 75  | 1            | III   | no    | surgery                                           | IV (T1a N0 M1a)                       | 84                  | 100  | 1                  | 16   |
| 36                        | pulmonary metastasis                      | M   | 83  | 2.4          | III   | ND    | surgery                                           | IV (T3a N1 M1b)                       | 98                  | >114 |                    |      |
| 37                        | lymph node metastasis                     | F   | 75  | 5            | IV    | yes   | surgery                                           | IIIc (T4b N3 M0)                      | 9                   | 21   | 7                  | 19   |
| 38                        | lymph node metastasis                     | M   | 59  | 2.3          | IV    | no    | surgery                                           | IIIc (T3a N3 M0)                      | 138                 | 144  | 5                  | 6    |
| 39                        | primary tumor                             | M   | 64  | 5            | IV    | yes   | no                                                | IIc (T4b N0 M0)                       | 18                  | 42   | 4                  | 4    |
| 40                        | lymph node metastasis                     | F   | 72  | 2.5          | IV    | no    | surgery                                           | IIIb (T3 N2b M0)                      | 120                 | >137 | >13                | >13  |
| 41                        | cutaneous metastasis                      | F   | 70  | ND           | ND    | ND    | chemotherapy; radiotherapy                        | IV (Tx Nx M1a)                        | >35                 | >35  | >37                | >37  |
| 42                        | sub-cutaneous metastasis                  | F   | 65  | 1.9          | III   | no    | surgery; radiotherapy; chemotherapy; IFN $\alpha$ | IV (T2 N0 M1a)                        | 13                  | 142  | 2                  | 19   |
| 43                        | lymph node metastasis                     | M   | 44  | 1            | III   | ND    | surgery                                           | IIIc (T1 N3 M0)                       | 17                  | 27   | 3                  | 9    |
| 44                        | lymph node metastasis                     | F   | 46  | 2.1          | IV    | ND    | IFN $\alpha$                                      | IV (T3 N0 M1a)                        | 50                  | >63  | 1                  | >13  |
| 45                        | primary tumor or lymph node metastasis    | F   | 50  | 2.8          | IV    | no    | no                                                | IIIa (T3 N1a M0)                      | 36                  | 171  | 36                 | 171  |

ND: not determined

Supplementary Table 3A: Impact of the frequencies of circulating or tumor-infiltrating DCs on clinical outcome (Log-rank test analysis and Cox regression analysis).

| Log-rank<br>( <i>p</i> -values)          | Patient blood |                 |              |                 |              |                 |             |                 | Patient tumor infiltrate |                 |              |                 |              |                 |             |                 |
|------------------------------------------|---------------|-----------------|--------------|-----------------|--------------|-----------------|-------------|-----------------|--------------------------|-----------------|--------------|-----------------|--------------|-----------------|-------------|-----------------|
|                                          | PFS diagnosis |                 | OS diagnosis |                 | PFS sampling |                 | OS sampling |                 | PFS diagnosis            |                 | OS diagnosis |                 | PFS sampling |                 | OS sampling |                 |
| BDCA1 within CD45                        | 0.286         |                 | 0.943        |                 | 0.808        |                 | 0.457       |                 | 0.241                    |                 | 0.842        |                 | 0.037        |                 | 0.062       |                 |
| BDCA2 within CD45                        | 0.028         |                 | 0.017        |                 | 0.052        |                 | 0.085       |                 | 0.376                    |                 | 0.724        |                 | 0.173        |                 | 0.783       |                 |
| BDCA3 within CD45                        | 0.193         |                 | 0.564        |                 | 0.005        |                 | 0.101       |                 | 0.541                    |                 | 0.209        |                 | 0.542        |                 | 0.530       |                 |
| COX regression<br>(HR, <i>p</i> -values) | Patient blood |                 |              |                 |              |                 |             |                 | Patient tumor infiltrate |                 |              |                 |              |                 |             |                 |
|                                          | PFS diagnosis |                 | OS diagnosis |                 | PFS sampling |                 | OS sampling |                 | PFS diagnosis            |                 | OS diagnosis |                 | PFS sampling |                 | OS sampling |                 |
|                                          | HR            | <i>p</i> -value | HR           | <i>p</i> -value | HR           | <i>p</i> -value | HR          | <i>p</i> -value | HR                       | <i>p</i> -value | HR           | <i>p</i> -value | HR           | <i>p</i> -value | HR          | <i>p</i> -value |
| BDCA1 within CD45                        | 23946.770     | 0.041           | 6.056        | 0.668           | 14.300       | 0.494           | 0.246       | 0.704           | 2.801                    | 0.069           | 2.963        | 0.116           | 2.368        | 0.110           | 1.596       | 0.370           |
| BDCA2 within CD45                        | 5.72E-06      | 0.064           | 5.41E-06     | 0.125           | 0.001        | 0.294           | 0.005       | 0.388           | 0.679                    | 0.528           | 0.942        | 0.931           | 1.230        | 0.796           | 1.791       | 0.408           |
| BDCA3 within CD45                        | 6.49E-12      | 0.621           | 1.55E-55     | 0.180           | 2.63E-70     | 0.071           | 8.42E-66    | 0.073           | 2.521                    | 0.466           | 2.169        | 0.563           | 0.870        | 0.906           | 0.618       | 0.690           |

Red when *p*-value<0.05

Supplementary Table 3B: Impact of the basal phenotype of circulating or tumor-infiltrating DCs on clinical outcome (Log-rank test analysis and Cox regression analysis).

| Log-rank<br>( <i>p</i> -values)          | Patient blood |                 |              |                 |              |                 |             |                 | Patient tumor infiltrate |                 |              |                 |              |                 |             |                 |
|------------------------------------------|---------------|-----------------|--------------|-----------------|--------------|-----------------|-------------|-----------------|--------------------------|-----------------|--------------|-----------------|--------------|-----------------|-------------|-----------------|
|                                          | PFS diagnosis |                 | OS diagnosis |                 | PFS sampling |                 | OS sampling |                 | PFS diagnosis            |                 | OS diagnosis |                 | PFS sampling |                 | OS sampling |                 |
| BDCA1 CD80                               | 0.518         |                 | 0.794        |                 | 0.776        |                 | 0.187       |                 | 0.015                    |                 | 0.207        |                 | 0.174        |                 | 0.551       |                 |
| BDCA1 CD40                               | 0.861         |                 | 0.810        |                 | 0.253        |                 | 0.481       |                 | 0.385                    |                 | 0.934        |                 | 0.618        |                 | 0.639       |                 |
| BDCA1 CD86                               | 0.646         |                 | 0.435        |                 | 0.817        |                 | 0.779       |                 | 0.774                    |                 | 0.099        |                 | 0.392        |                 | 0.735       |                 |
| BDCA2 CD80                               | 0.668         |                 | 0.711        |                 | 0.321        |                 | 0.435       |                 | 0.257                    |                 | 0.419        |                 | 0.048        |                 | 0.096       |                 |
| BDCA2 CD40                               | 0.159         |                 | 0.564        |                 | 0.092        |                 | 0.329       |                 | 0.151                    |                 | 0.001        |                 | 0.804        |                 | 0.235       |                 |
| BDCA2 CD86                               | 0.423         |                 | 0.640        |                 | 0.585        |                 | 0.576       |                 | 0.033                    |                 | 0.056        |                 | 0.108        |                 | 0.212       |                 |
| BDCA3 CD80                               | 0.620         |                 | 0.674        |                 | 0.928        |                 | 0.620       |                 | 0.111                    |                 | 0.130        |                 | 0.121        |                 | 0.224       |                 |
| BDCA3 CD40                               | 0.490         |                 | 0.165        |                 | 0.037        |                 | 0.045       |                 | 0.135                    |                 | 0.008        |                 | 0.688        |                 | 0.635       |                 |
| BDCA3 CD86                               | 0.748         |                 | 0.170        |                 | 0.601        |                 | 0.724       |                 | 0.947                    |                 | 0.076        |                 | 0.483        |                 | 0.790       |                 |
| COX regression<br>(HR, <i>p</i> -values) | Patient blood |                 |              |                 |              |                 |             |                 | Patient tumor infiltrate |                 |              |                 |              |                 |             |                 |
|                                          | PFS diagnosis |                 | OS diagnosis |                 | PFS sampling |                 | OS sampling |                 | PFS diagnosis            |                 | OS diagnosis |                 | PFS sampling |                 | OS sampling |                 |
|                                          | HR            | <i>p</i> -value | HR           | <i>p</i> -value | HR           | <i>p</i> -value | HR          | <i>p</i> -value | HR                       | <i>p</i> -value | HR           | <i>p</i> -value | HR           | <i>p</i> -value | HR          | <i>p</i> -value |
| BDCA1 CD80                               | 0.938         | 0.598           | 1.007        | 0.955           | 0.971        | 0.800           | 0.993       | 0.947           | 1.020                    | 0.040           | 1.019        | 0.109           | 1.010        | 0.313           | 0.998       | 0.849           |
| BDCA1 CD40                               | 0.940         | 0.171           | 0.924        | 0.150           | 0.799        | 0.025           | 0.863       | 0.026           | 1.066                    | 0.211           | 0.975        | 0.615           | 1.024        | 0.625           | 0.975       | 0.527           |
| BDCA1 CD86                               | 1.006         | 0.775           | 0.981        | 0.369           | 1.006        | 0.791           | 1.000       | 0.99            | 0.985                    | 0.413           | 0.959        | 0.026           | 1.006        | 0.740           | 1.004       | 0.818           |
| BDCA2 CD80                               | 0.956         | 0.839           | 1.068        | 0.769           | 1.013        | 0.951           | 1.037       | 0.863           | 1.020                    | 0.226           | 1.022        | 0.159           | 1.016        | 0.328           | 1.016       | 0.267           |
| BDCA2 CD40                               | 0.934         | 0.045           | 0.927        | 0.068           | 0.924        | 0.046           | 0.962       | 0.195           | 0.992                    | 0.522           | 0.960        | 0.005           | 1.010        | 0.533           | 0.994       | 0.607           |
| BDCA2 CD86                               | 1.010         | 0.484           | 0.995        | 0.707           | 1.007        | 0.640           | 1.008       | 0.602           | 0.987                    | 0.122           | 0.981        | 0.042           | 0.997        | 0.745           | 1.000       | 0.967           |
| BDCA3 CD80                               | 0.897         | 0.397           | 0.952        | 0.703           | 0.992        | 0.941           | 1.014       | 0.884           | 1.015                    | 0.101           | 1.022        | 0.033           | 1.013        | 0.183           | 1.010       | 0.304           |
| BDCA3 CD40                               | 0.884         | 0.111           | 0.849        | 0.064           | 0.851        | 0.038           | 0.864       | 0.055           | 0.989                    | 0.808           | 0.922        | 0.090           | 1.049        | 0.399           | 0.958       | 0.428           |
| BDCA3 CD86                               | 1.000         | 0.993           | 0.958        | 0.407           | 1.022        | 0.718           | 1.033       | 0.562           | 0.988                    | 0.364           | 0.969        | 0.034           | 1.000        | 0.995           | 1.005       | 0.733           |

Red when *p*-value<0.05

Supplementary Table 4: Impact of the activation status after TLR stimulation of circulating or tumor-infiltrating DCs on clinical outcome (Log-rank test analysis).

| Log-rank ( <i>p</i> -values) | Patient blood |              |              |             | Patient tumor infiltrate |              |              |             |
|------------------------------|---------------|--------------|--------------|-------------|--------------------------|--------------|--------------|-------------|
|                              | PFS diagnosis | OS diagnosis | PFS sampling | OS sampling | PFS diagnosis            | OS diagnosis | PFS sampling | OS sampling |
| BDCA1 CD80 w/o stim          | 0.963         | 0.974        | 0.270        | 0.231       | 0.953                    | 0.522        | 0.084        | 0.797       |
| BDCA1 CD80 polyIC            | 0.114         | 0.018        | 0.683        | 0.185       | 0.767                    | 0.264        | 0.197        | 0.909       |
| BDCA1 CD80 R848              | 0.025         | 0.034        | 0.303        | 0.261       | 0.472                    | 0.343        | 0.441        | 0.872       |
| BDCA1 CD80 CpGa              | 0.003         | 0.018        | 0.075        | 0.185       | 0.472                    | 0.343        | 0.441        | 0.872       |
| BDCA1 CD80 mix               | 0.011         | 0.179        | 0.487        | 0.568       | 0.606                    | 0.121        | 0.062        | 0.686       |
| BDCA1 CD40 w/o stim          | 0.318         | 0.521        | 0.538        | 0.204       | 0.082                    | 0.845        | 0.032        | 0.476       |
| BDCA1 CD40 polyIC            | 0.317         | 0.098        | 0.870        | 0.433       | 0.169                    | 0.694        | 0.343        | 0.872       |
| BDCA1 CD40 R848              | 0.003         | 0.018        | 0.075        | 0.185       | 0.634                    | 0.607        | 0.694        | 0.673       |
| BDCA1 CD40 CpGa              | 0.003         | 0.018        | 0.075        | 0.185       | 0.300                    | 0.707        | 0.277        | 0.142       |
| BDCA1 CD40 mix               | 0.058         | 0.295        | 0.819        | 0.956       | 0.921                    | 0.535        | 0.953        | 0.679       |
| BDCA1 CD86 w/o stim          | 0.773         | 0.600        | 0.524        | 0.798       | 0.625                    | 0.814        | 0.953        | 0.527       |
| BDCA1 CD86 polyIC            | 0.499         | 0.577        | 0.722        | 0.923       | 0.212                    | 0.832        | 0.343        | 0.527       |
| BDCA1 CD86 R848              | 0.499         | 0.824        | 0.722        | 0.700       | 0.383                    | 0.863        | 0.277        | 0.035       |
| BDCA1 CD86 CpGa              | 0.114         | 0.062        | 0.683        | 0.337       | 0.383                    | 0.863        | 0.277        | 0.035       |
| BDCA1 CD86 mix               | 0.617         | 0.464        | 0.421        | 0.963       | 0.091                    | 0.643        | 0.048        | 0.004       |
| BDCA2 CD80 w/o stim          | 0.530         | 0.796        | 0.839        | 0.354       | 0.010                    | 0.328        | 0.132        | 0.996       |
| BDCA2 CD80 polyIC            | 0.499         | 0.577        | 0.722        | 0.835       | 0.309                    | 0.707        | 0.025        | 0.762       |
| BDCA2 CD80 R848              | 0.809         | 0.949        | 0.383        | 0.528       | 0.780                    | 0.486        | 0.694        | 0.355       |
| BDCA2 CD80 CpGa              | 0.499         | 0.577        | 0.722        | 0.835       | 0.767                    | 0.343        | 0.713        | 0.679       |
| BDCA2 CD80 mix               | 0.492         | 0.964        | 0.311        | 0.289       | 0.163                    | 0.014        | 0.575        | 0.142       |
| BDCA2 CD40 w/o stim          | 0.645         | 0.316        | 0.853        | 0.789       | 0.875                    | 0.625        | 0.143        | 0.822       |
| BDCA2 CD40 polyIC            | 0.809         | 0.702        | 0.383        | 0.721       | 0.139                    | 0.015        | 0.951        | 0.583       |
| BDCA2 CD40 R848              | 0.589         | 0.577        | 0.994        | 0.120       | 0.534                    | 0.694        | 0.832        | 0.094       |
| BDCA2 CD40 CpGa              | 0.317         | 0.171        | 0.123        | 0.051       | 0.863                    | 0.013        | 0.049        | 0.544       |
| BDCA2 CD40 mix               | 0.814         | 0.271        | 0.992        | 0.717       | 0.533                    | 0.597        | 0.609        | 0.985       |
| BDCA2 CD86 w/o stim          | 0.414         | 0.316        | 0.685        | 0.789       | 0.302                    | 0.824        | 0.449        | 0.188       |
| BDCA2 CD86 polyIC            | 0.079         | 0.051        | 0.619        | 0.395       | 0.383                    | 0.863        | 0.277        | 0.035       |
| BDCA2 CD86 R848              | 0.589         | 0.134        | 0.508        | 0.599       | 0.290                    | 0.109        | 0.607        | 0.065       |
| BDCA2 CD86 CpGa              | 0.025         | 0.034        | 0.303        | 0.311       | 0.383                    | 0.863        | 0.277        | 0.035       |
| BDCA2 CD86 mix               | 0.537         | 0.401        | 0.819        | 0.884       | 0.914                    | 0.720        | 0.625        | 0.208       |

Red when *p*-value<0.05; w/o stim: without stimulation

Supplementary Table 5: Impact of the activation status of circulating DCs after TLR stimulation on clinical outcome (Cox regression analysis).

| COX regression<br>(HR, <i>p</i> -values) | Patient blood    |                 |                 |                 |                 |                 |                |                 |
|------------------------------------------|------------------|-----------------|-----------------|-----------------|-----------------|-----------------|----------------|-----------------|
|                                          | PFS<br>diagnosis |                 | OS<br>diagnosis |                 | PFS<br>sampling |                 | OS<br>sampling |                 |
|                                          | HR               | <i>p</i> -value | HR              | <i>p</i> -value | HR              | <i>p</i> -value | HR             | <i>p</i> -value |
| BDCA1 CD80 w/o stim                      | 0.984            | 0.539           | 0.993           | 0.819           | 1.009           | 0.692           | 1.000          | 0.985           |
| BDCA1 CD80 polyIC                        | 0.864            | 0.111           | 0.898           | 0.181           | 0.975           | 0.485           | 0.975          | 0.438           |
| BDCA1 CD80 R848                          | 0.760            | 0.271           | 0.910           | 0.227           | 0.975           | 0.437           | 0.980          | 0.493           |
| BDCA1 CD80 CpGa                          | 0.901            | 0.029           | 0.941           | 0.098           | 0.960           | 0.151           | 0.970          | 0.219           |
| BDCA1 CD80 mix                           | 0.911            | 0.064           | 0.954           | 0.264           | 0.987           | 0.718           | 0.997          | 0.944           |
| BDCA1 CD40 w/o stim                      | 0.946            | 0.080           | 0.980           | 0.483           | 0.987           | 0.596           | 0.987          | 0.578           |
| BDCA1 CD40 polyIC                        | 0.876            | 0.031           | 0.905           | 0.113           | 0.957           | 0.287           | 0.959          | 0.253           |
| BDCA1 CD40 R848                          | 0.553            | 0.745           | 0.915           | 0.154           | 0.946           | 0.106           | 0.960          | 0.191           |
| BDCA1 CD40 CpGa                          | 0.905            | 0.026           | 0.933           | 0.103           | 0.955           | 0.121           | 0.963          | 0.152           |
| BDCA1 CD40 mix                           | 0.941            | 0.097           | 0.992           | 0.793           | 0.992           | 0.743           | 0.997          | 0.899           |
| BDCA1 CD86 w/o stim                      | 1.000            | 0.991           | 1.041           | 0.349           | 1.027           | 0.420           | 1.016          | 0.632           |
| BDCA1 CD86 polyIC                        | 0.967            | 0.445           | 0.940           | 0.327           | 0.991           | 0.844           | 0.968          | 0.465           |
| BDCA1 CD86 R848                          | 0.954            | 0.250           | 0.929           | 0.268           | 0.965           | 0.456           | 0.945          | 0.275           |
| BDCA1 CD86 CpGa                          | 0.936            | 0.133           | 0.062           | 0.999           | 0.902           | 0.299           | 0.830          | 0.125           |
| BDCA1 CD86 mix                           | 0.984            | 0.557           | 1.010           | 0.782           | 1.012           | 0.670           | 1.008          | 0.806           |
| BDCA2 CD80 w/o stim                      | 1.024            | 0.632           | 0.928           | 0.634           | 1.036           | 0.492           | 0.824          | 0.519           |
| BDCA2 CD80 polyIC                        | 1.024            | 0.285           | 0.987           | 0.842           | 1.012           | 0.619           | 0.950          | 0.554           |
| BDCA2 CD80 R848                          | 1.077            | 0.263           | 1.093           | 0.426           | 1.014           | 0.818           | 1.005          | 0.940           |
| BDCA2 CD80 CpGa                          | 1.024            | 0.502           | 0.971           | 0.715           | 1.010           | 0.763           | 0.971          | 0.599           |
| BDCA2 CD80 mix                           | 1.003            | 0.946           | 1.005           | 0.923           | 1.001           | 0.981           | 0.969          | 0.518           |
| BDCA2 CD40 w/o stim                      | 0.989            | 0.715           | 1.003           | 0.942           | 0.996           | 0.904           | 0.991          | 0.774           |
| BDCA2 CD40 polyIC                        | 0.943            | 0.414           | 0.949           | 0.569           | 0.912           | 0.188           | 0.932          | 0.342           |
| BDCA2 CD40 R848                          | 0.893            | 0.127           | 0.949           | 0.339           | 0.943           | 0.234           | 0.974          | 0.573           |
| BDCA2 CD40 CpGa                          | 0.916            | 0.145           | 0.935           | 0.174           | 0.953           | 0.229           | 0.953          | 0.206           |
| BDCA2 CD40 mix                           | 0.923            | 0.072           | 0.994           | 0.912           | 0.982           | 0.641           | 0.983          | 0.692           |
| BDCA2 CD86 w/o stim                      | 1.020            | 0.331           | 1.026           | 0.283           | 1.017           | 0.446           | 1.018          | 0.408           |
| BDCA2 CD86 polyIC                        | 1.263            | 0.253           | 1.087           | 0.202           | 1.021           | 0.531           | 1.019          | 0.526           |
| BDCA2 CD86 R848                          | 1.042            | 0.482           | 1.236           | 0.268           | 0.980           | 0.712           | 1.037          | 0.570           |
| BDCA2 CD86 CpGa                          | 1.032            | 0.281           | 1.047           | 0.310           | 1.019           | 0.518           | 1.016          | 0.653           |
| BDCA2 CD86 mix                           | 0.989            | 0.761           | 1.105           | 0.136           | 1.011           | 0.775           | 1.030          | 0.517           |

Red when *p*-value<0.05; w/o stim: without stimulation

Supplementary Table 6: Impact of the activation status of tumor-infiltrating DCs after TLR stimulation on clinical outcome (Cox regression analysis).

| COX regression<br>(HR, <i>p</i> -values) | Patient tumor infiltrate |                 |                 |                 |                 |                 |                |                 |
|------------------------------------------|--------------------------|-----------------|-----------------|-----------------|-----------------|-----------------|----------------|-----------------|
|                                          | PFS<br>diagnosis         |                 | OS<br>diagnosis |                 | PFS<br>sampling |                 | OS<br>sampling |                 |
|                                          | HR                       | <i>p</i> -value | HR              | <i>p</i> -value | HR              | <i>p</i> -value | HR             | <i>p</i> -value |
| BDCA1 CD80 w/o stim                      | 1.022                    | 0.253           | 1.046           | 0.043           | 0.964           | 0.194           | 1.001          | 0.949           |
| BDCA1 CD80 polyIC                        | 0.995                    | 0.826           | 1.009           | 0.775           | 0.964           | 0.248           | 0.981          | 0.431           |
| BDCA1 CD80 R848                          | 0.955                    | 0.360           | 1.005           | 0.890           | 0.988           | 0.824           | 0.969          | 0.401           |
| BDCA1 CD80 CpGa                          | 1.001                    | 0.983           | 1.041           | 0.291           | 0.969           | 0.519           | 0.966          | 0.308           |
| BDCA1 CD80 mix                           | 1.031                    | 0.174           | 1.033           | 0.188           | 0.972           | 0.236           | 0.970          | 0.220           |
| BDCA1 CD40 w/o stim                      | 1.106                    | 0.227           | 0.937           | 0.388           | 1.290           | 0.082           | 1.005          | 0.922           |
| BDCA1 CD40 polyIC                        | 1.064                    | 0.381           | 1.062           | 0.471           | 1.090           | 0.434           | 0.948          | 0.538           |
| BDCA1 CD40 R848                          | 1.077                    | 0.459           | 0.979           | 0.705           | 1.031           | 0.695           | 1.009          | 0.829           |
| BDCA1 CD40 CpGa                          | 1.072                    | 0.512           | 1.007           | 0.943           | 0.934           | 0.599           | 0.963          | 0.557           |
| BDCA1 CD40 mix                           | 0.982                    | 0.583           | 0.977           | 0.434           | 0.996           | 0.880           | 0.980          | 0.523           |
| BDCA1 CD86 w/o stim                      | 0.983                    | 0.367           | 1.017           | 0.324           | 1.007           | 0.775           | 1.035          | 0.070           |
| BDCA1 CD86 polyIC                        | 0.944                    | 0.066           | 1.003           | 0.874           | 0.982           | 0.310           | 1.015          | 0.373           |
| BDCA1 CD86 R848                          | 0.971                    | 0.241           | 1.006           | 0.722           | 1.010           | 0.643           | 1.059          | 0.055           |
| BDCA1 CD86 CpGa                          | 0.985                    | 0.584           | 1.018           | 0.476           | 1.010           | 0.739           | 1.056          | 0.081           |
| BDCA1 CD86 mix                           | 0.964                    | 0.093           | 1.006           | 0.700           | 1.020           | 0.438           | 1.049          | 0.034           |
| BDCA2 CD80 w/o stim                      | 1.012                    | 0.245           | 1.012           | 0.332           | 1.012           | 0.269           | 1.013          | 0.270           |
| BDCA2 CD80 polyIC                        | 1.003                    | 0.816           | 0.984           | 0.421           | 1.048           | 0.086           | 1.019          | 0.361           |
| BDCA2 CD80 R848                          | 0.983                    | 0.588           | 1.021           | 0.403           | 0.991           | 0.828           | 1.054          | 0.115           |
| BDCA2 CD80 CpGa                          | 1.002                    | 0.893           | 0.994           | 0.767           | 1.024           | 0.336           | 1.017          | 0.587           |
| BDCA2 CD80 mix                           | 1.018                    | 0.213           | 1.027           | 0.088           | 1.001           | 0.960           | 1.033          | 0.081           |
| BDCA2 CD40 w/o stim                      | 1.004                    | 0.699           | 0.996           | 0.768           | 1.019           | 0.283           | 1.004          | 0.718           |
| BDCA2 CD40 polyIC                        | 0.931                    | 0.138           | 0.785           | 0.088           | 1.009           | 0.795           | 0.972          | 0.457           |
| BDCA2 CD40 R848                          | 0.904                    | 0.450           | 1.096           | 0.505           | 1.061           | 0.661           | 2.076          | 0.078           |
| BDCA2 CD40 CpGa                          | 0.967                    | 0.512           | 0.765           | 0.079           | 1.074           | 0.257           | 0.983          | 0.654           |
| BDCA2 CD40 mix                           | 1.006                    | 0.618           | 1.003           | 0.820           | 1.009           | 0.520           | 1.011          | 0.457           |
| BDCA2 CD86 w/o stim                      | 0.986                    | 0.262           | 0.984           | 0.273           | 1.022           | 0.133           | 1.026          | 0.123           |
| BDCA2 CD86 polyIC                        | 0.986                    | 0.332           | 0.992           | 0.545           | 1.015           | 0.297           | 1.049          | 0.042           |
| BDCA2 CD86 R848                          | 1.007                    | 0.726           | 1.018           | 0.394           | 1.014           | 0.415           | 1.099          | 0.245           |
| BDCA2 CD86 CpGa                          | 0.984                    | 0.380           | 0.996           | 0.810           | 1.019           | 0.349           | 1.060          | 0.040           |
| BDCA2 CD86 mix                           | 0.999                    | 0.962           | 1.008           | 0.474           | 1.013           | 0.397           | 1.028          | 0.081           |

Red when *p*-value<0.05; w/o stim: without stimulation

Supplementary Table 7: Impact of intra-cellular cytokine production by circulating or tumor-infiltrating DCs after TLR stimulation on clinical outcome (Log-rank test analysis).

| Log rank ( <i>p</i> -values)   | Patient blood |              |              |             | Patient tumor infiltrate |              |              |             |
|--------------------------------|---------------|--------------|--------------|-------------|--------------------------|--------------|--------------|-------------|
|                                | PFS diagnosis | OS diagnosis | PFS sampling | OS sampling | PFS diagnosis            | OS diagnosis | PFS sampling | OS sampling |
| BDCA1 TNF $\alpha$ w/o stim    | 0.818         | 0.314        | 0.512        | 0.064       | 0.549                    | 0.563        | 0.645        | 0.674       |
| BDCA1 TNF $\alpha$ polyIC      | 0.530         | 0.846        | 0.702        | 0.400       | 0.253                    | 0.542        | 0.021        | 0.510       |
| BDCA1 TNF $\alpha$ R848        | 0.318         | 0.521        | 0.538        | 0.113       | 0.372                    | 0.909        | 0.022        | 0.872       |
| BDCA1 TNF $\alpha$ mix         | 0.518         | 0.847        | 0.797        | 0.368       | 0.347                    | 0.301        | 0.007        | 0.870       |
| BDCA1 IL-12 p40/p70 w/o stim   | 0.040         | 0.227        | 0.501        | 0.505       | 0.945                    | 0.095        | 0.427        | 0.093       |
| BDCA1 IL-12 p40/p70 polyIC     | 0.002         | 0.028        | 0.153        | 0.176       | 0.919                    | 0.046        | 0.449        | 0.233       |
| BDCA1 IL-12 p40/p70 R848       | 0.318         | 0.290        | 0.469        | 0.653       | 0.051                    | 0.779        | 0.212        | 0.779       |
| BDCA1 IL-12 p40/p70 mix        | 0.264         | 0.609        | 0.402        | 0.100       | 0.353                    | 0.215        | 0.144        | 0.835       |
| BDCA2 IFN $\alpha$ w/o stim    | 0.439         | 0.618        | 0.942        | 0.882       | 0.396                    | 0.542        | 0.079        | 0.699       |
| BDCA2 IFN $\alpha$ R848        | 0.963         | 0.420        | 0.839        | 0.709       | 0.195                    | 0.886        | 0.025        | 0.492       |
| BDCA2 IFN $\alpha$ CpGa        | 0.799         | 0.919        | 0.554        | 0.599       | 0.520                    | 0.596        | 0.391        | 0.254       |
| BDCA2 IFN $\alpha$ mix         | 0.304         | 0.418        | 0.177        | 0.122       | 0.806                    | 0.680        | 0.306        | 0.203       |
| BDCA2 TNF $\alpha$ w/o stim    | 0.245         | 0.943        | 0.378        | 0.530       | 0.390                    | 0.600        | 0.180        | 0.652       |
| BDCA2 TNF $\alpha$ R848        | 0.053         | 0.028        | 0.774        | 0.176       | 0.452                    | 0.716        | 0.157        | 0.261       |
| BDCA2 TNF $\alpha$ CpGa        | 0.135         | 0.031        | 0.278        | 0.182       | 0.962                    | 0.554        | 0.025        | 0.373       |
| BDCA2 TNF $\alpha$ mix         | 0.131         | 0.443        | 0.228        | 0.056       | 0.032                    | 0.826        | 0.296        | 0.441       |
| BDCA3 IFN $\lambda$ 1 w/o stim | 0.212         | 0.017        | 0.362        | 0.085       | 0.156                    | 0.404        | 0.902        | 0.413       |
| BDCA3 IFN $\lambda$ 1 polyIC   | 0.530         | 0.846        | 0.702        | 0.144       | 0.505                    | 0.311        | 0.030        | 0.960       |
| BDCA3 IFN $\lambda$ 1 mix      | 0.423         | 0.664        | 0.549        | 0.970       | 0.920                    | 0.874        | 0.079        | 0.753       |
| BDCA3 TNF $\alpha$ w/o stim    | 0.818         | 0.214        | 0.624        | 0.461       | 0.811                    | 0.392        | 0.110        | 0.791       |
| BDCA3 TNF $\alpha$ polyIC      | 0.696         | 0.536        | 0.992        | 0.604       | 0.253                    | 0.542        | 0.021        | 0.510       |
| BDCA3 TNF $\alpha$ mix         | 0.845         | 0.996        | 0.650        | 0.399       | 0.400                    | 0.240        | 0.389        | 0.157       |

Red when *p*-value<0.05; w/o stim:without stimulation



Supplementary Table 8: Impact of intra-cellular cytokine production by circulating or tumor-infiltrating DCs after TLR stimulation on clinical outcome (Cox regression analysis).

| COX regression<br>(HR, <i>p</i> -values) | Patient blood |                 |              |                 |              |                 |             |                 | Patient tumor infiltrate |                 |              |                 |              |                 |             |                 |
|------------------------------------------|---------------|-----------------|--------------|-----------------|--------------|-----------------|-------------|-----------------|--------------------------|-----------------|--------------|-----------------|--------------|-----------------|-------------|-----------------|
|                                          | PFS diagnosis |                 | OS diagnosis |                 | PFS sampling |                 | OS sampling |                 | PFS diagnosis            |                 | OS diagnosis |                 | PFS sampling |                 | OS sampling |                 |
|                                          | HR            | <i>p</i> -value | HR           | <i>p</i> -value | HR           | <i>p</i> -value | HR          | <i>p</i> -value | HR                       | <i>p</i> -value | HR           | <i>p</i> -value | HR           | <i>p</i> -value | HR          | <i>p</i> -value |
| BDCA1 TNF $\alpha$ w/o stim              | 1.451         | 0.233           | 0.992        | 0.989           | 0.949        | 0.900           | 0.620       | 0.376           | 1.000                    | 0.995           | 1.061        | 0.309           | 0.950        | 0.446           | 1.013       | 0.782           |
| BDCA1 TNF $\alpha$ polyIC                | 0.988         | 0.872           | 0.995        | 0.958           | 0.969        | 0.749           | 0.819       | 0.206           | 0.908                    | 0.043           | 0.991        | 0.779           | 0.896        | 0.076           | 0.973       | 0.545           |
| BDCA1 TNF $\alpha$ R848                  | 0.976         | 0.544           | 0.982        | 0.690           | 0.983        | 0.682           | 0.947       | 0.172           | 0.984                    | 0.525           | 0.999        | 0.975           | 0.938        | 0.231           | 1.010       | 0.672           |
| BDCA1 TNF $\alpha$ mix                   | 0.987         | 0.563           | 1.001        | 0.982           | 0.988        | 0.633           | 0.963       | 0.175           | 0.988                    | 0.475           | 1.020        | 0.274           | 0.949        | 0.174           | 1.005       | 0.760           |
| BDCA1 IL-12 p40/p70 w/o stim             | 0.848         | 0.048           | 0.819        | 0.101           | 0.953        | 0.585           | 0.909       | 0.326           | 0.980                    | 0.488           | 1.024        | 0.477           | 1.031        | 0.460           | 1.007       | 0.802           |
| BDCA1 IL-12 p40/p70 polyIC               | 0.747         | 0.024           | 0.811        | 0.167           | 0.872        | 0.202           | 0.852       | 0.178           | 0.955                    | 0.239           | 1.041        | 0.239           | 1.052        | 0.477           | 1.016       | 0.584           |
| BDCA1 IL-12 p40/p70 R848                 | 0.924         | 0.130           | 0.964        | 0.464           | 1.000        | 0.990           | 0.980       | 0.618           | 0.947                    | 0.125           | 0.998        | 0.942           | 0.980        | 0.608           | 1.000       | 0.987           |
| BDCA1 IL-12 p40/p70 mix                  | 0.922         | 0.122           | 0.954        | 0.398           | 0.983        | 0.709           | 0.941       | 0.231           | 0.955                    | 0.115           | 1.020        | 0.479           | 0.961        | 0.194           | 0.981       | 0.512           |
| BDCA2 IFN $\alpha$ w/o stim              | 0.844         | 0.767           | 1.105        | 0.869           | 0.889        | 0.840           | 0.897       | 0.872           | 1.056                    | 0.617           | 0.946        | 0.611           | 0.916        | 0.489           | 0.993       | 0.938           |
| BDCA2 IFN $\alpha$ R848                  | 0.877         | 0.568           | 0.819        | 0.602           | 0.805        | 0.465           | 0.545       | 0.228           | 0.960                    | 0.262           | 0.970        | 0.426           | 0.957        | 0.357           | 1.022       | 0.633           |
| BDCA2 IFN $\alpha$ CpGa                  | 0.632         | 0.639           | 0.141        | 0.666           | 0.632        | 0.675           | 0.005       | 0.483           | 1.046                    | 0.537           | 1.094        | 0.297           | 0.950        | 0.674           | 1.084       | 0.348           |
| BDCA2 IFN $\alpha$ mix                   | 0.876         | 0.439           | 0.861        | 0.506           | 0.851        | 0.405           | 0.750       | 0.261           | 0.966                    | 0.180           | 0.970        | 0.349           | 0.962        | 0.137           | 0.989       | 0.605           |
| BDCA2 TNF $\alpha$ w/o stim              | 4.574         | 0.225           | 4.637        | 0.403           | 4.240        | 0.231           | 1.688       | 0.638           | 0.894                    | 0.604           | 1.022        | 0.911           | 1.211        | 0.545           | 1.136       | 0.564           |
| BDCA2 TNF $\alpha$ R848                  | 0.938         | 0.113           | 0.930        | 0.150           | 0.965        | 0.340           | 0.929       | 0.100           | 0.995                    | 0.803           | 1.005        | 0.870           | 0.951        | 0.270           | 1.111       | 0.102           |
| BDCA2 TNF $\alpha$ CpGa                  | 2.637         | 0.106           | 7.208        | 0.113           | 2.440        | 0.139           | 2.193       | 0.118           | 1.009                    | 0.806           | 1.029        | 0.453           | 1.005        | 0.901           | 1.135       | 0.161           |
| BDCA2 TNF $\alpha$ mix                   | 0.942         | 0.145           | 0.946        | 0.241           | 0.964        | 0.374           | 0.929       | 0.127           | 0.988                    | 0.392           | 1.002        | 0.958           | 0.974        | 0.383           | 1.025       | 0.354           |
| BDCA3 IFN $\lambda$ 1 w/o stim           | 0.598         | 0.157           | 0.000        | 0.997           | 0.798        | 0.324           | 0.706       | 0.187           | 1.025                    | 0.288           | 0.983        | 0.549           | 0.980        | 0.484           | 0.997       | 0.890           |
| BDCA3 IFN $\lambda$ 1 polyIC             | 0.911         | 0.138           | 0.950        | 0.387           | 0.947        | 0.291           | 0.864       | 0.086           | 0.984                    | 0.292           | 0.952        | 0.224           | 0.844        | 0.041           | 0.973       | 0.285           |
| BDCA3 IFN $\lambda$ 1 mix                | 1.023         | 0.622           | 1.035        | 0.555           | 0.950        | 0.439           | 0.965       | 0.569           | 1.002                    | 0.850           | 0.992        | 0.662           | 0.954        | 0.037           | 0.975       | 0.180           |
| BDCA3 TNF $\alpha$ w/o stim              | 1.018         | 0.751           | 0.950        | 0.564           | 1.001        | 0.983           | 0.987       | 0.849           | 0.983                    | 0.336           | 0.986        | 0.582           | 0.934        | 0.209           | 0.991       | 0.792           |
| BDCA3 TNF $\alpha$ polyIC                | 1.031         | 0.387           | 1.044        | 0.201           | 1.003        | 0.933           | 0.993       | 0.823           | 0.966                    | 0.158           | 0.982        | 0.434           | 0.913        | 0.083           | 0.975       | 0.338           |
| BDCA3 TNF $\alpha$ mix                   | 0.989         | 0.789           | 1.008        | 0.874           | 0.895        | 0.061           | 0.908       | 0.049           | 0.994                    | 0.566           | 1.008        | 0.664           | 0.990        | 0.724           | 1.015       | 0.478           |

Red when *p*-value<0.05; w/o stim:without stimulation

Supplementary Table 9: Impact of secreted cytokines present in circulating blood or tumor infiltrate after TLR stimulation on clinical outcome (Log-rank test analysis).

| Log-rank<br>( <i>p</i> -values) | Patient blood    |                 |                 |                | Patient tumor infiltrate |                 |                 |                |
|---------------------------------|------------------|-----------------|-----------------|----------------|--------------------------|-----------------|-----------------|----------------|
|                                 | PFS<br>diagnosis | OS<br>diagnosis | PFS<br>sampling | OS<br>sampling | PFS<br>diagnosis         | OS<br>diagnosis | PFS<br>sampling | OS<br>sampling |
| IFN $\alpha$ w/o stim           | 0.244            | 0.016           | 0.477           | 0.149          | 0.053                    | 0.006           | 0.417           | 0.887          |
| IFN $\alpha$ polyIC             | 0.317            | 0.171           | 0.870           | 0.607          | 0.849                    | 0.411           | 0.640           | 0.282          |
| IFN $\alpha$ R848               | 0.809            | 0.702           | 0.383           | 0.721          | 0.695                    | 0.018           | 0.299           | 0.923          |
| IFN $\alpha$ CpGa               | 0.246            | 0.450           | 0.867           | 0.954          | 0.754                    | 0.127           | 0.207           | 0.309          |
| IFN $\alpha$ mix                | 0.480            | 0.039           | 0.774           | 0.310          | 0.594                    | 0.752           | 0.825           | 0.066          |
| IFN $\beta$ w/o stim            | 0.480            | 0.265           | 0.311           | 0.990          | 0.598                    | 0.142           | 0.253           | 0.436          |
| IFN $\beta$ polyIC              | 0.317            | 0.949           | 0.619           | 0.395          | 0.544                    | 0.431           | 0.955           | 0.847          |
| IFN $\beta$ R848                | 0.589            | 0.226           | 0.383           | 0.074          | 0.695                    | 0.018           | 0.299           | 0.923          |
| IFN $\beta$ CpGa                | 0.246            | 0.157           | 0.867           | 0.654          | 0.455                    | 0.888           | 0.774           | 0.646          |
| IFN $\beta$ mix                 | 0.480            | 0.039           | 0.774           | 0.310          | 0.531                    | 0.769           | 0.191           | 0.163          |
| IL-12p70 w/o stim               | 0.773            | 0.417           | 0.524           | 0.717          | 0.475                    | 0.704           | 0.724           | 0.741          |
| IL-12p70 polyIC                 | 0.589            | 0.134           | 0.508           | 0.599          | 0.199                    | 0.283           | 0.821           | 0.924          |
| IL-12p70 R848                   | 0.809            | 0.702           | 0.508           | 0.176          | 0.695                    | 0.018           | 0.299           | 0.923          |
| IL-12p70 CpGa                   | 0.170            | 0.281           | 0.994           | 0.897          | 0.251                    | 0.920           | 0.946           | 0.171          |
| IL-12p70 mix                    | 0.480            | 0.048           | 0.774           | 0.243          | 0.363                    | 0.510           | 0.729           | 0.233          |
| IFN $\lambda$ 1 w/o stim        | 0.753            | 0.332           | 0.919           | 0.856          | 0.752                    | 0.158           | 0.751           | 0.647          |
| IFN $\lambda$ 1 polyIC          | 0.809            | 0.949           | 0.383           | 0.599          | 0.199                    | 0.283           | 0.821           | 0.924          |
| IFN $\lambda$ 1 R848            | 0.589            | 0.226           | 0.383           | 0.093          | 0.558                    | 0.984           | 0.063           | 0.438          |
| IFN $\lambda$ 1 CpGa            | 0.246            | 0.450           | 0.867           | 0.954          | 0.025                    | 0.269           | 0.110           | 0.781          |
| IFN $\lambda$ 1 mix             | 0.773            | 0.058           | 0.919           | 0.404          | 0.514                    | 0.231           | 0.316           | 0.362          |
| IFN $\lambda$ 2 w/o stim        | 0.773            | 0.417           | 0.524           | 0.717          | 0.825                    | 0.802           | 0.945           | 0.500          |
| IFN $\lambda$ 2 polyIC          | 0.499            | 0.824           | 0.722           | 0.700          | 0.655                    | 0.806           | 0.766           | 0.506          |
| IFN $\lambda$ 2 R848            | 0.809            | 0.949           | 0.383           | 0.528          | 0.558                    | 0.302           | 0.774           | 0.358          |
| IFN $\lambda$ 2 CpGa            | 0.246            | 0.157           | 0.867           | 0.654          | 0.359                    | 0.269           | 0.786           | 0.171          |
| IFN $\lambda$ 2 mix             | 0.773            | 0.058           | 0.919           | 0.404          | 0.297                    | 0.711           | 0.900           | 0.787          |

Red when *p*-value<0.05; w/o stim:without stimulation

Supplementary Table 10: Impact of secreted cytokines present in circulating blood or tumor infiltrate after TLR stimulation on clinical outcome (Cox regression analysis).

| COX regression<br>(HR, <i>p</i> -values) | Patient blood    |                 |                 |                 |                 |                 |                |                 | Patient tumor infiltrate |                 |                 |                 |                 |                 |                |                 |
|------------------------------------------|------------------|-----------------|-----------------|-----------------|-----------------|-----------------|----------------|-----------------|--------------------------|-----------------|-----------------|-----------------|-----------------|-----------------|----------------|-----------------|
|                                          | PFS<br>diagnosis |                 | OS<br>diagnosis |                 | PFS<br>sampling |                 | OS<br>sampling |                 | PFS<br>diagnosis         |                 | OS<br>diagnosis |                 | PFS<br>sampling |                 | OS<br>sampling |                 |
|                                          | HR               | <i>p</i> -value | HR              | <i>p</i> -value | HR              | <i>p</i> -value | HR             | <i>p</i> -value | HR                       | <i>p</i> -value | HR              | <i>p</i> -value | HR              | <i>p</i> -value | HR             | <i>p</i> -value |
| IFN $\alpha$ w/o stim                    | 0.999            | 0.876           | 0.981           | 0.191           | 1.000           | 0.967           | 0.991          | 0.353           | 1.001                    | 0.055           | 1.002           | 0.007           | 1.000           | 0.464           | 1.001          | 0.095           |
| IFN $\alpha$ polyIC                      | 0.999            | 0.273           | 0.999           | 0.403           | 1.000           | 0.412           | 1.000          | 0.619           | 1.000                    | 0.830           | 1.001           | 0.120           | 1.000           | 0.622           | 1.001          | 0.286           |
| IFN $\alpha$ R848                        | 1.001            | 0.225           | 1.000           | 0.918           | 1.001           | 0.559           | 0.999          | 0.763           | 1.000                    | 0.595           | 1.000           | 0.973           | 1.000           | 0.434           | 1.000          | 0.251           |
| IFN $\alpha$ CpGa                        | 1.000            | 0.265           | 1.000           | 0.319           | 1.000           | 0.674           | 1.000          | 0.736           | 1.000                    | 0.589           | 1.000           | 0.369           | 1.000           | 0.794           | 1.000          | 0.131           |
| IFN $\alpha$ mix                         | 0.999            | 0.343           | 0.998           | 0.100           | 1.000           | 0.716           | 0.999          | 0.326           | 1.000                    | 0.597           | 1.000           | 0.956           | 1.000           | 0.807           | 1.000          | 0.067           |
| IFN $\beta$ w/o stim                     | 0.994            | 0.532           | 0.977           | 0.276           | 0.987           | 0.415           | 0.994          | 0.634           | 1.001                    | 0.467           | 1.002           | 0.309           | 1.003           | 0.152           | 1.002          | 0.326           |
| IFN $\beta$ polyIC                       | 0.997            | 0.250           | 0.998           | 0.422           | 1.000           | 0.924           | 1.000          | 0.702           | 1.000                    | 0.977           | 1.000           | 0.645           | 1.000           | 0.629           | 1.002          | 0.332           |
| IFN $\beta$ R848                         | 1.004            | 0.374           | 0.988           | 0.571           | 1.002           | 0.656           | 0.983          | 0.319           | 1.000                    | 0.555           | 1.000           | 0.932           | 1.000           | 0.393           | 1.000          | 0.239           |
| IFN $\beta$ CpGa                         | 0.999            | 0.282           | 0.997           | 0.221           | 1.000           | 0.846           | 1.000          | 0.671           | 1.000                    | 0.869           | 1.000           | 0.756           | 1.000           | 0.472           | 1.000          | 0.141           |
| IFN $\beta$ mix                          | 0.995            | 0.161           | 0.983           | 0.086           | 1.000           | 0.956           | 0.998          | 0.509           | 1.000                    | 0.905           | 1.000           | 0.621           | 1.000           | 0.822           | 1.000          | 0.911           |
| IL-12p70 w/o stim                        | 1.017            | 0.887           | 0.969           | 0.819           | 0.972           | 0.832           | 1.107          | 0.447           | 0.996                    | 0.830           | 1.007           | 0.681           | 1.039           | 0.142           | 0.998          | 0.926           |
| IL-12p70 polyIC                          | 0.994            | 0.678           | 1.001           | 0.954           | 0.986           | 0.480           | 0.993          | 0.710           | 1.000                    | 0.997           | 1.001           | 0.965           | 0.980           | 0.220           | 0.994          | 0.709           |
| IL-12p70 R848                            | 1.019            | 0.283           | 0.960           | 0.749           | 1.013           | 0.439           | 0.969          | 0.622           | 1.028                    | 0.273           | 0.979           | 0.434           | 1.066           | 0.173           | 0.999          | 0.966           |
| IL-12p70 CpGa                            | 1.163            | 0.274           | 1.086           | 0.676           | 1.110           | 0.387           | 1.010          | 0.927           | 0.946                    | 0.330           | 1.024           | 0.684           | 1.039           | 0.573           | 1.138          | 0.115           |
| IL-12p70 mix                             | 1.002            | 0.839           | 0.852           | 0.065           | 1.008           | 0.484           | 0.965          | 0.334           | 0.993                    | 0.232           | 1.001           | 0.799           | 1.000           | 0.968           | 1.012          | 0.075           |
| IFN $\lambda$ 1 w/o stim                 | 1.000            | 0.961           | 0.993           | 0.331           | 1.001           | 0.909           | 1.002          | 0.745           | 1.000                    | 0.664           | 1.001           | 0.491           | 1.002           | 0.199           | 1.000          | 0.723           |
| IFN $\lambda$ 1 polyIC                   | 1.002            | 0.705           | 1.000           | 0.982           | 1.005           | 0.320           | 0.999          | 0.889           | 1.002                    | 0.112           | 1.000           | 0.692           | 1.001           | 0.592           | 0.999          | 0.442           |
| IFN $\lambda$ 1 R848                     | 0.998            | 0.885           | 1.009           | 0.657           | 1.023           | 0.228           | 1.039          | 0.105           | 1.004                    | 0.107           | 0.999           | 0.715           | 1.285           | 0.998           | 0.999          | 0.527           |
| IFN $\lambda$ 1 CpGa                     | 0.996            | 0.535           | 0.997           | 0.609           | 1.000           | 0.993           | 1.000          | 0.909           | 1.016                    | 0.069           | 1.001           | 0.756           | 1.004           | 0.184           | 0.999          | 0.714           |
| IFN $\lambda$ 1 mix                      | 1.001            | 0.766           | 0.994           | 0.217           | 1.003           | 0.541           | 0.998          | 0.731           | 0.999                    | 0.417           | 1.001           | 0.277           | 1.001           | 0.595           | 1.001          | 0.379           |
| IFN $\lambda$ 2 w/o stim                 | 0.998            | 0.873           | 0.990           | 0.519           | 0.992           | 0.573           | 1.003          | 0.801           | 1.003                    | 0.197           | 0.999           | 0.719           | 0.999           | 0.732           | 0.995          | 0.147           |
| IFN $\lambda$ 2 polyIC                   | 0.999            | 0.261           | 0.999           | 0.251           | 1.001           | 0.459           | 1.000          | 0.894           | 1.000                    | 0.419           | 1.000           | 0.476           | 1.000           | 0.927           | 1.000          | 0.470           |
| IFN $\lambda$ 2 R848                     | 1.002            | 0.704           | 0.987           | 0.640           | 1.000           | 0.987           | 0.976          | 0.450           | 1.000                    | 0.552           | 1.000           | 0.862           | 1.000           | 0.414           | 1.001          | 0.220           |
| IFN $\lambda$ 2 CpGa                     | 0.998            | 0.269           | 0.996           | 0.300           | 1.000           | 0.881           | 0.999          | 0.681           | 1.000                    | 0.584           | 1.000           | 0.739           | 1.000           | 0.811           | 1.001          | 0.124           |
| IFN $\lambda$ 2 mix                      | 0.999            | 0.301           | 0.986           | 0.121           | 1.001           | 0.528           | 0.997          | 0.179           | 1.000                    | 0.974           | 1.000           | 0.787           | 1.000           | 0.982           | 1.000          | 0.893           |

Red when *p*-value<0.05; w/o stim:without stimulation
